# Supplementary material for: Valproic acid upregulates the expression of the p75NTR/sortilin receptor complex to induce neuronal apoptosis
Source: PubMed Central journal article supplement (PMC7527367; doi:10.1007/s10495-020-01626-0), 2020-07-25

Western blots used to generate the data reported in scatter plots

Fig. 1A

p75NTR / actin

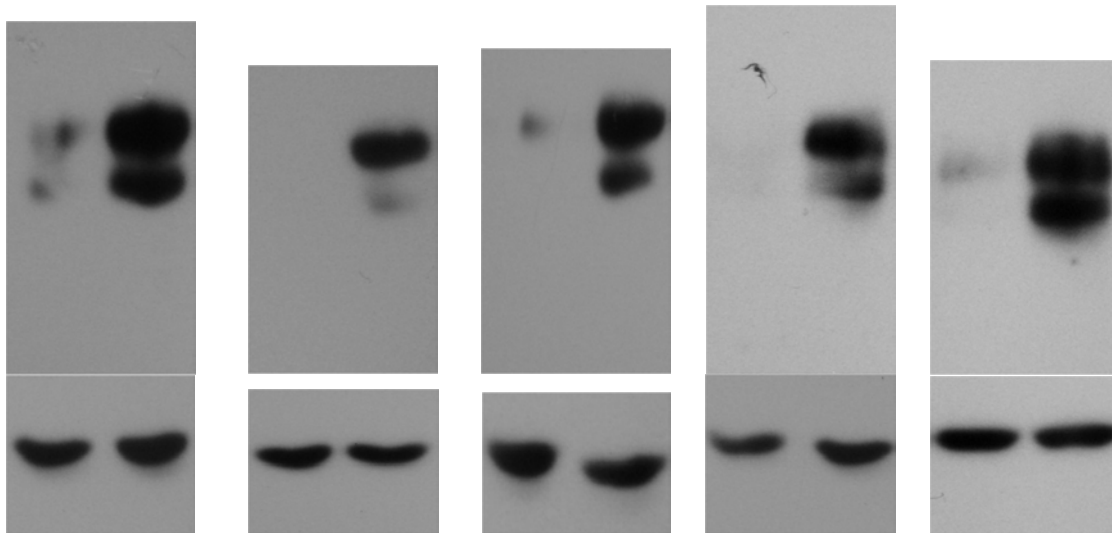

**Fig. 1B**  
**sortilin / actin**

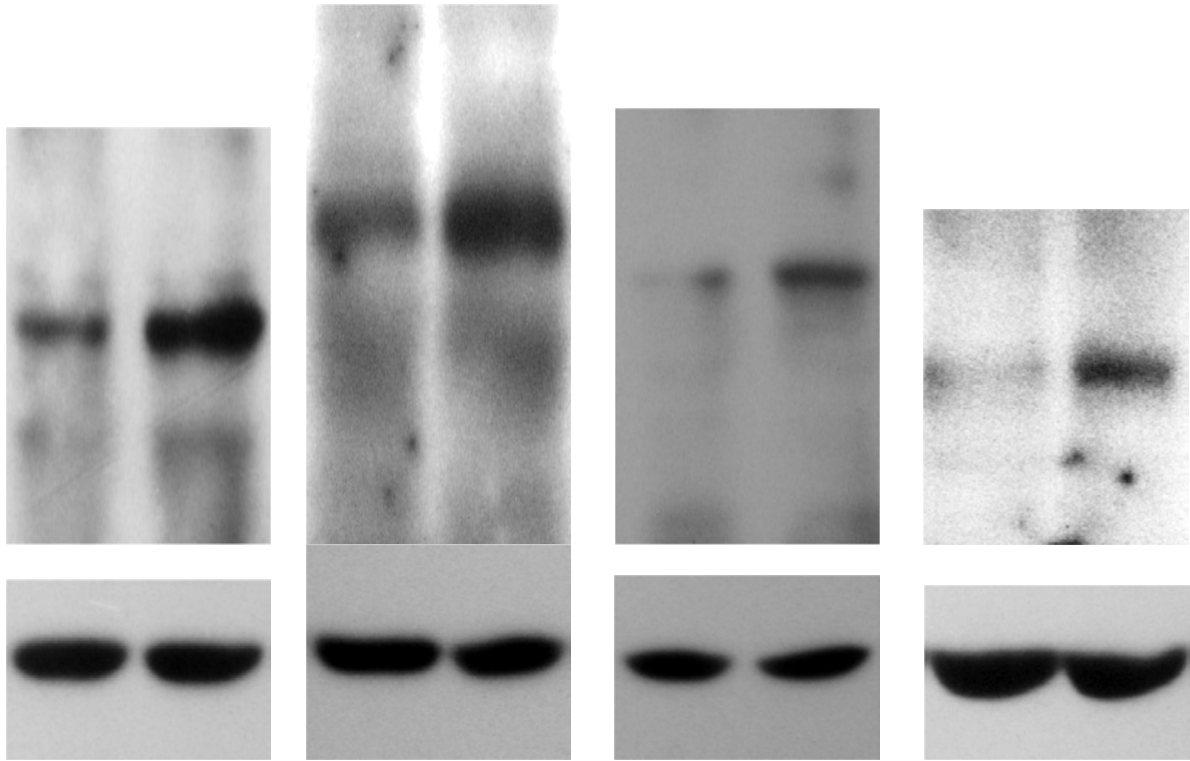

**Fig. 1D**

**LAN-1**

**p75NTR / actin**

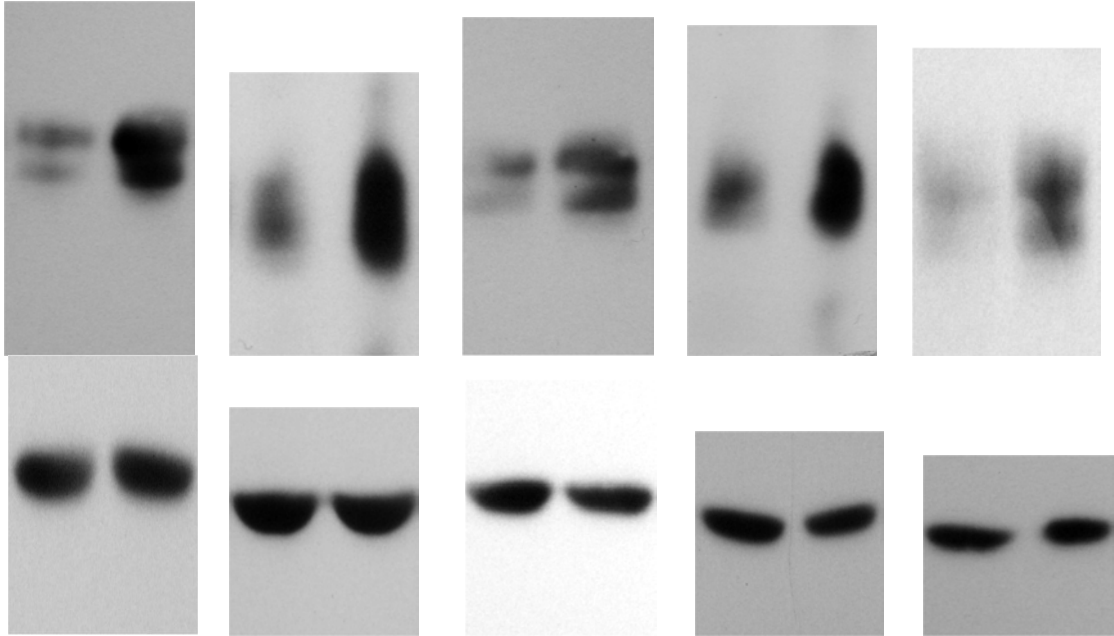

**Fig 1E**  
**sortilin / actin**

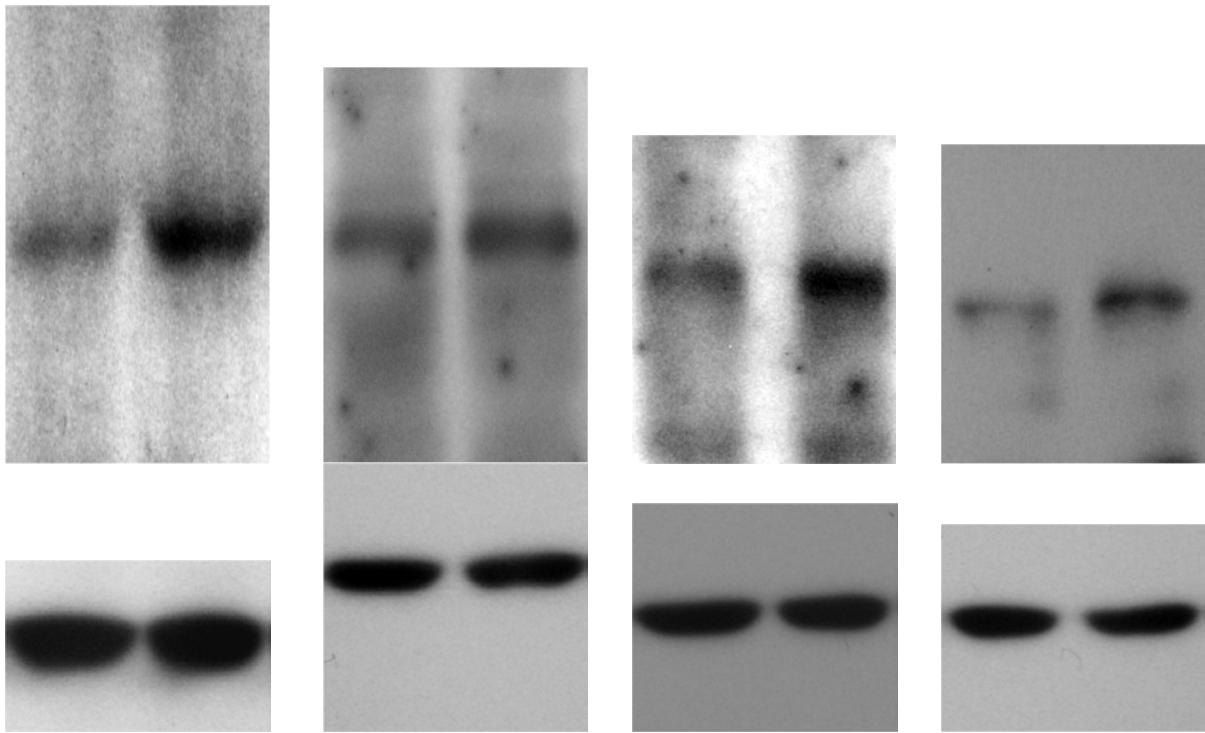

Fig. 2A

SH-SY5Y

p75NTR / pan-cadherin

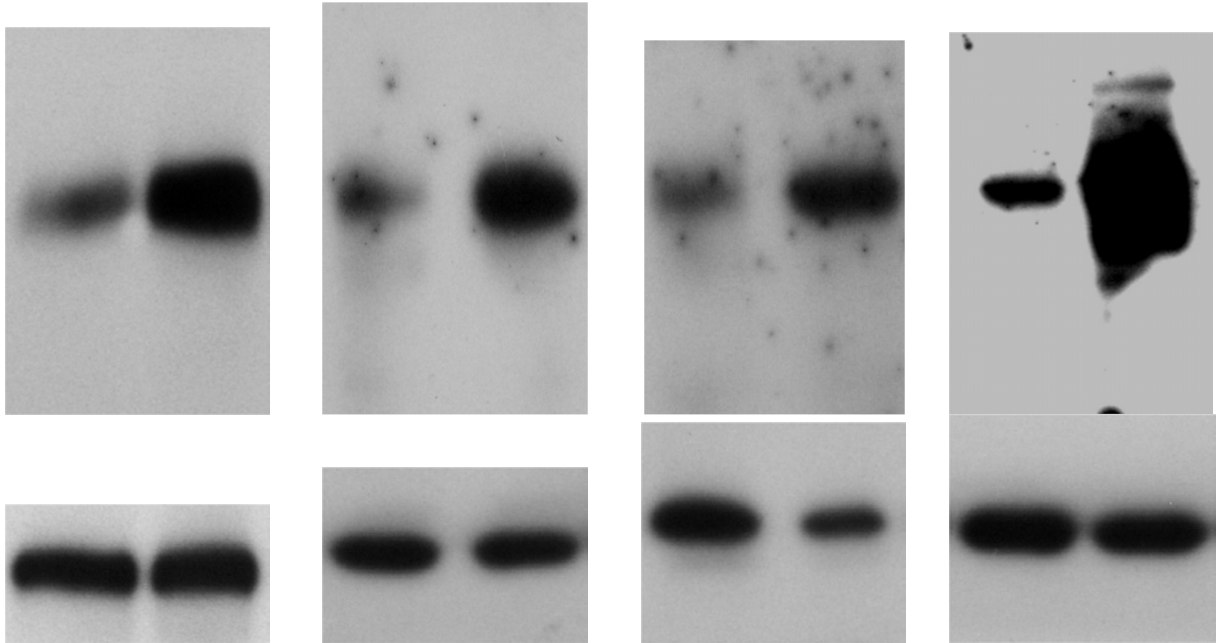

Fig. 2A

sortilin / pan-cadherin

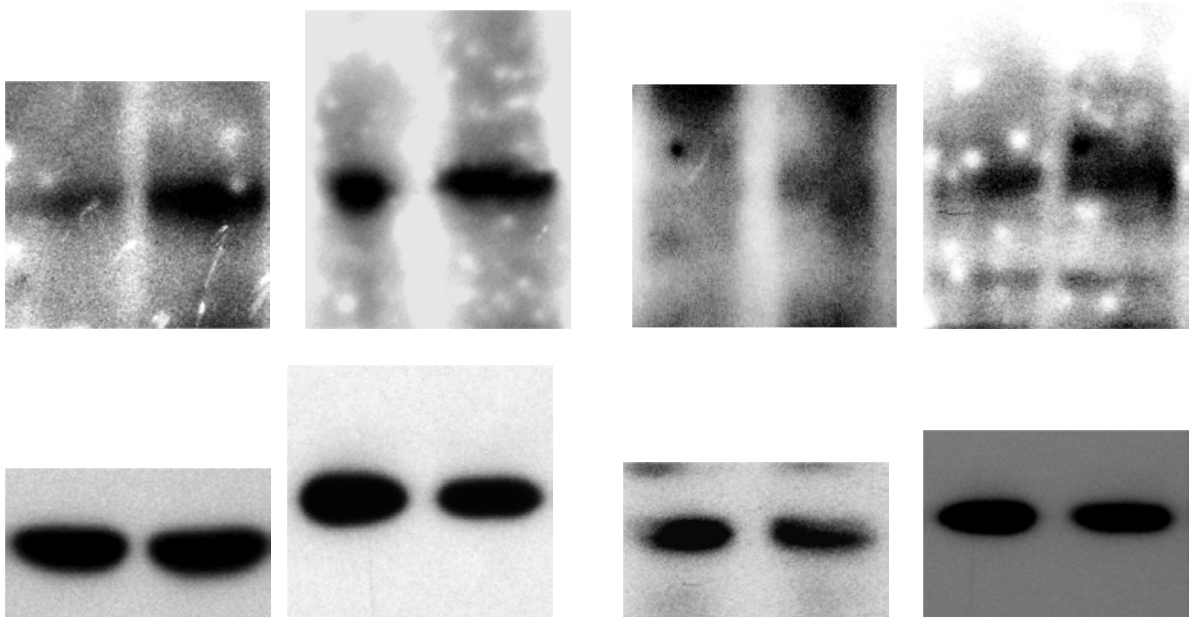

**Fig. 2A**

**LAN-1**

**p75NTR / pan-cadherin**

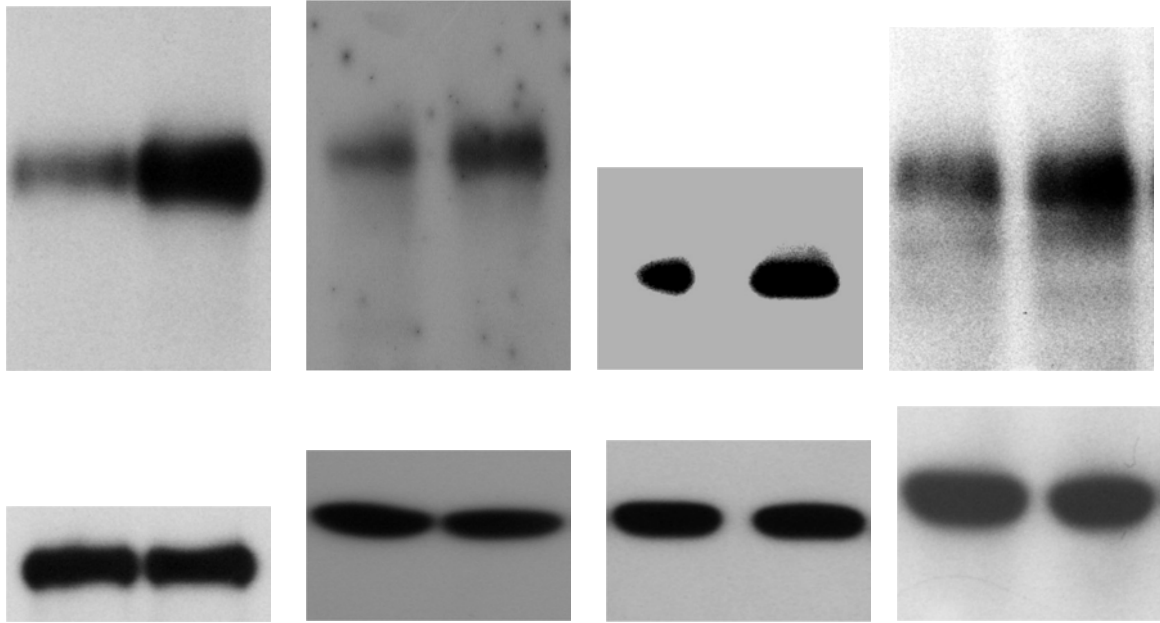

**Fig.2A**

**sortilin / pan-cadherin**

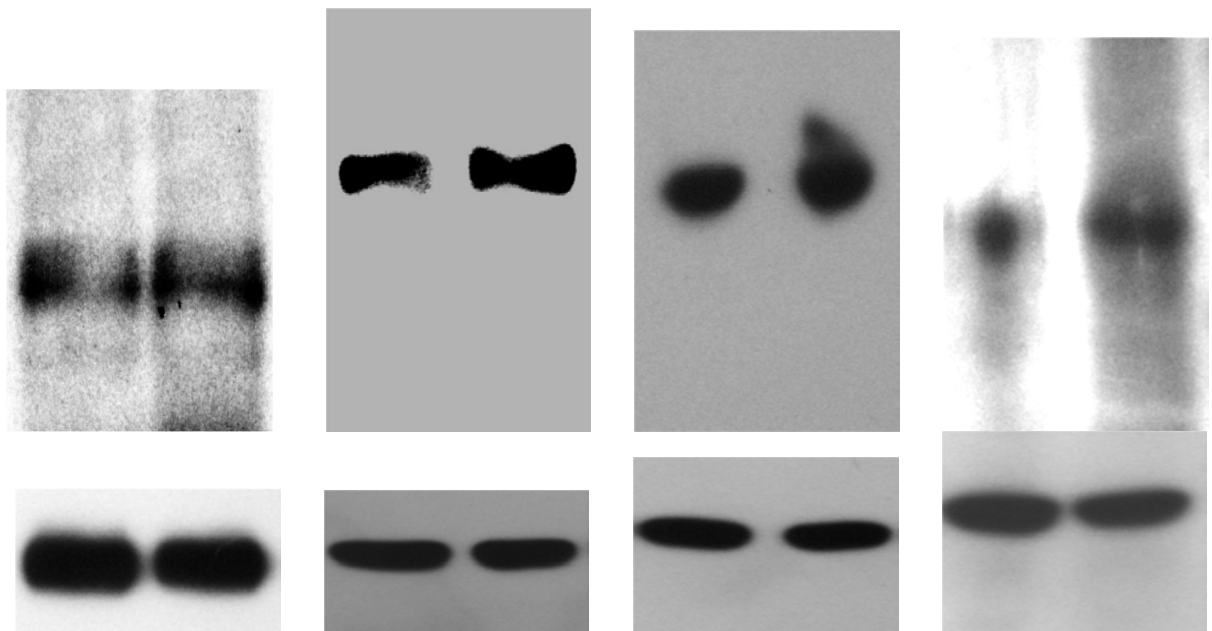

**Fig, 3A**

**p75NTR / actin**

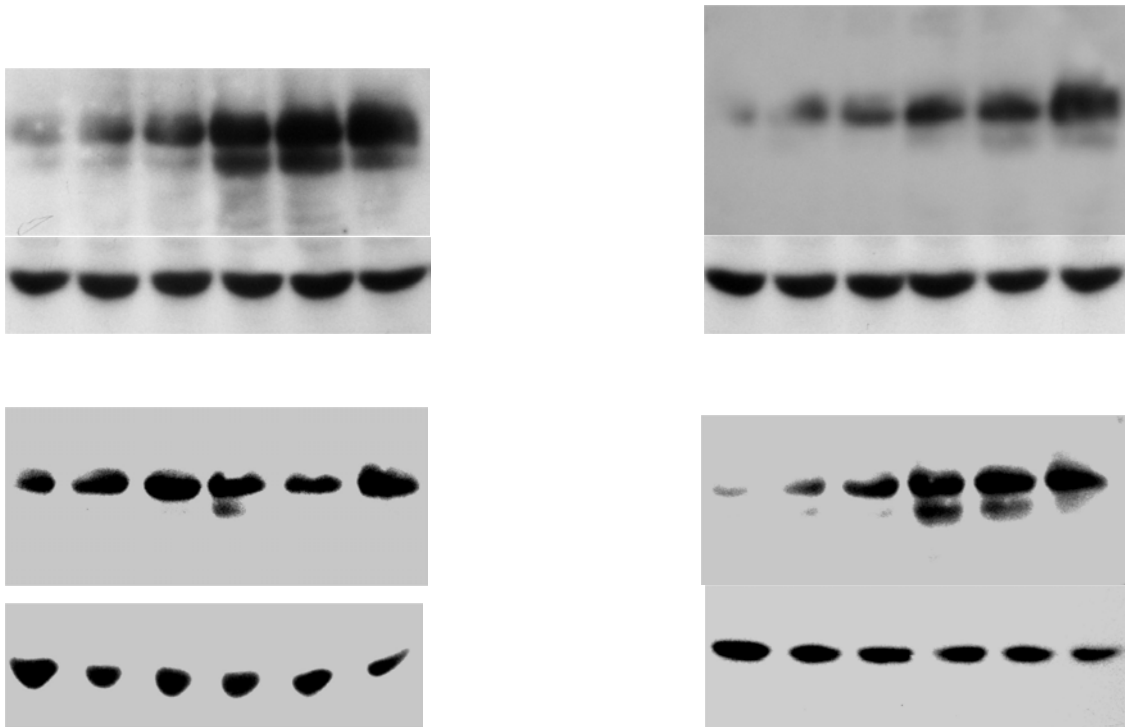

**Fig. 3B**

**p75NTR / actin**

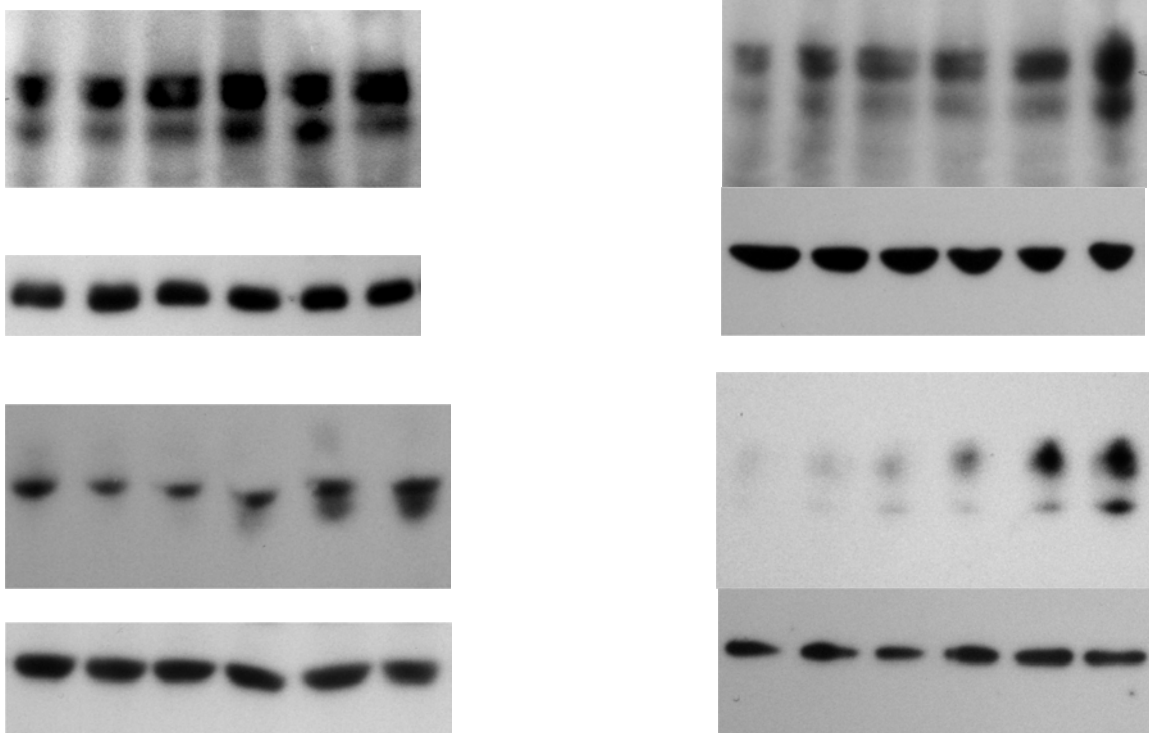

**Fig. 3C**

**p75NTR / actin**

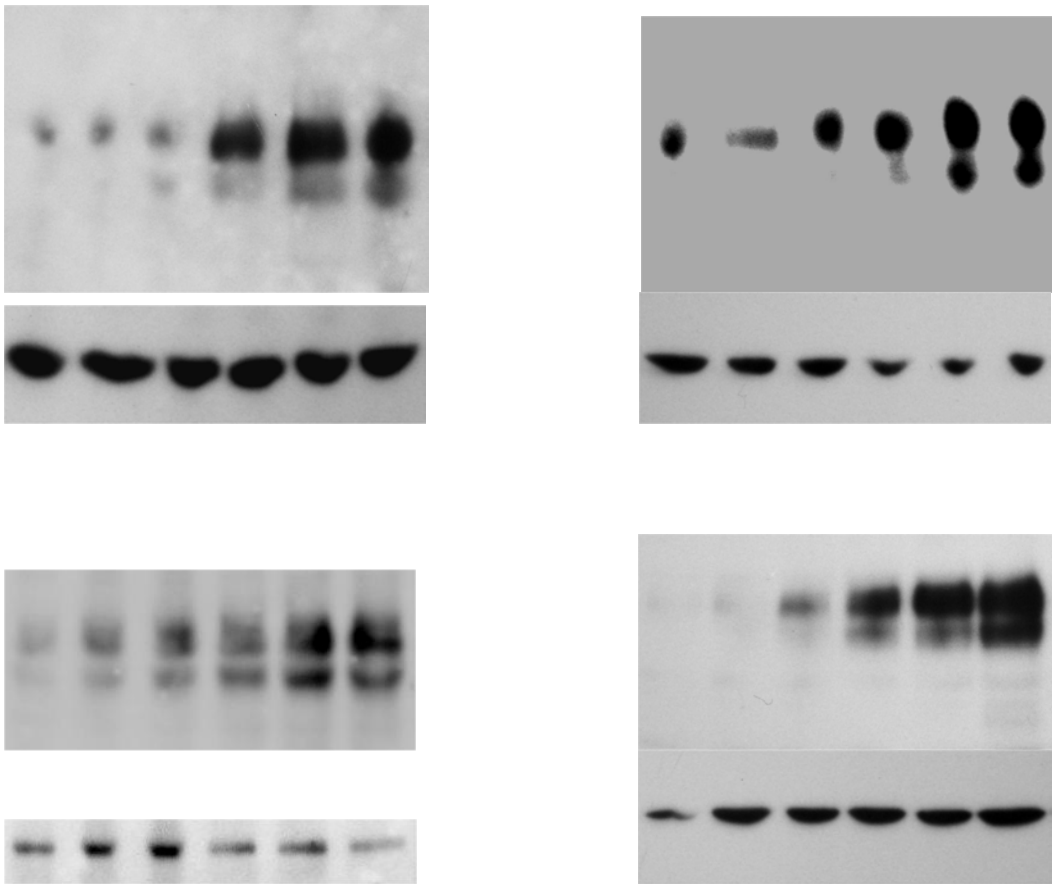

**Fig. 3D**

**p75NTR / actin**

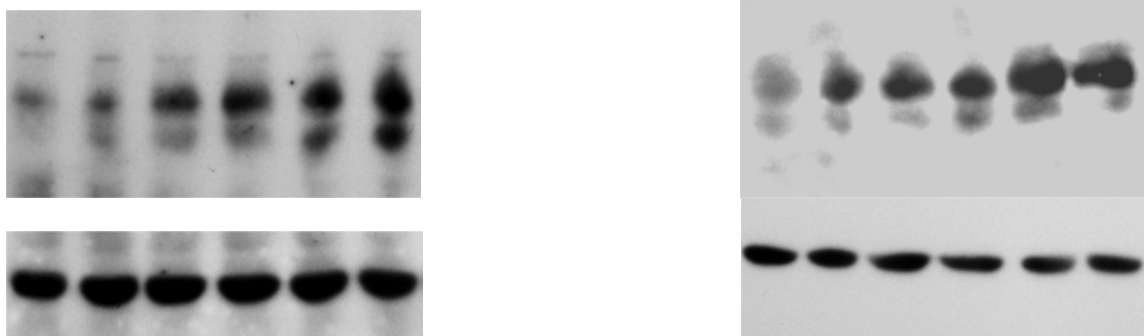



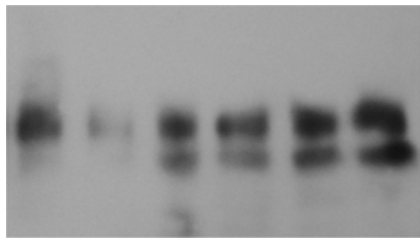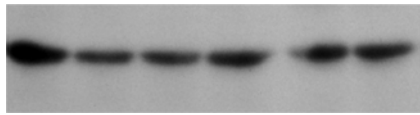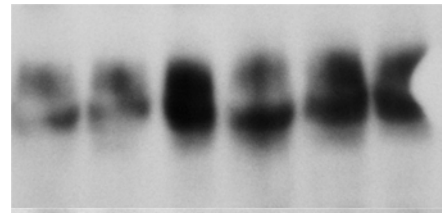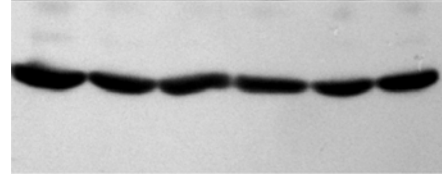

**Fig.3E**  
**sortilin / actin**

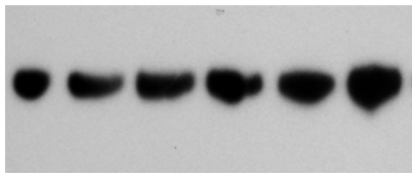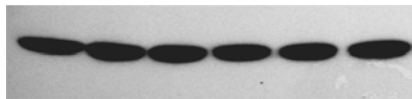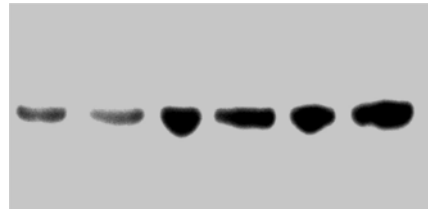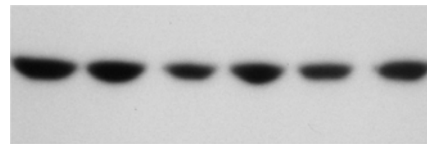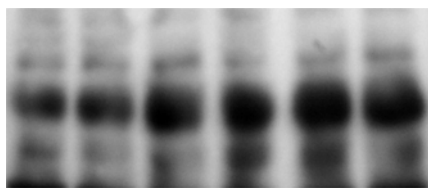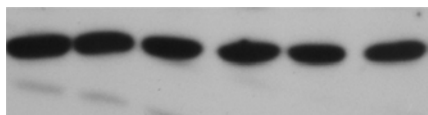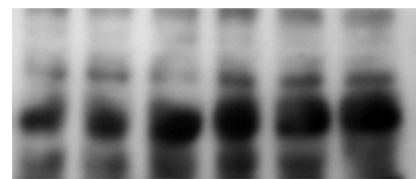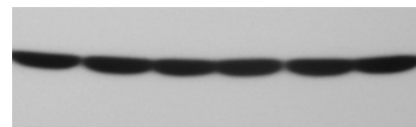

**Fig. 3F**

**sortilin / actin**

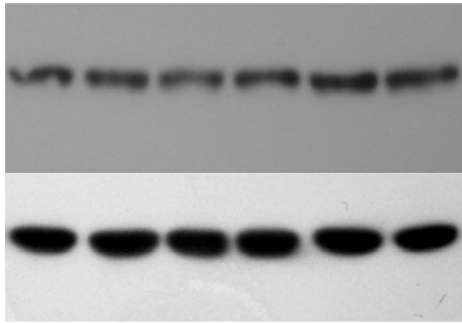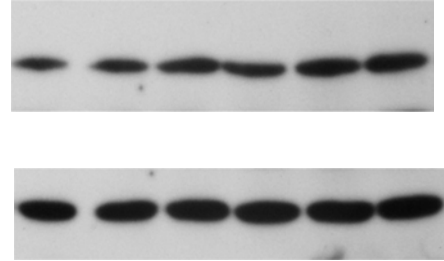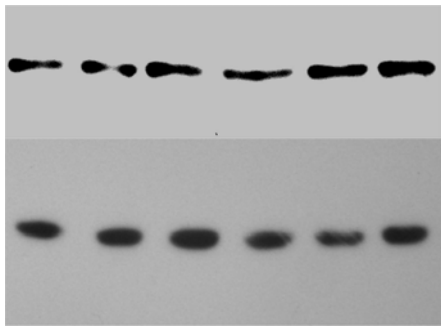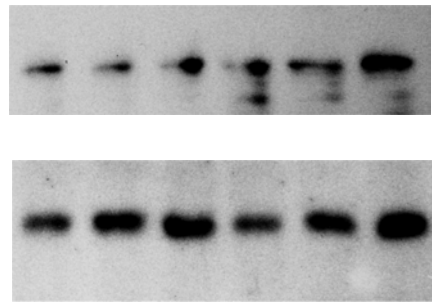

**Fig. 4A**

**p75NTR / actin**

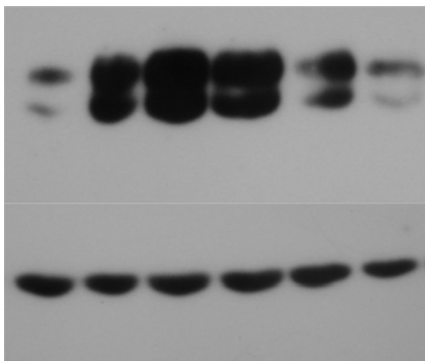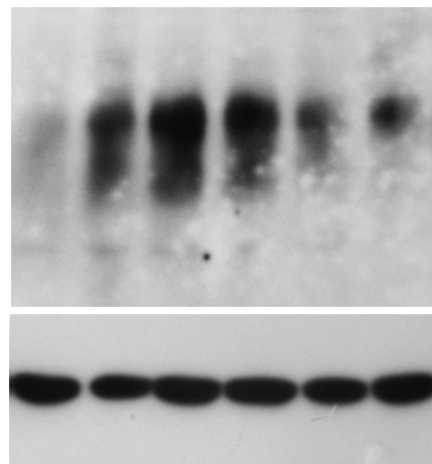

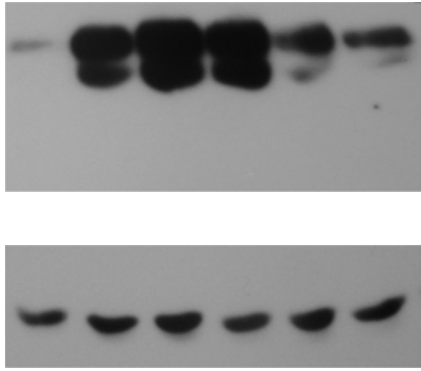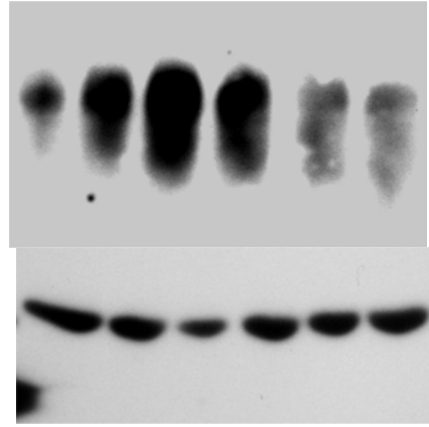

**Fig. 4B**  
**p75NTR / actin**

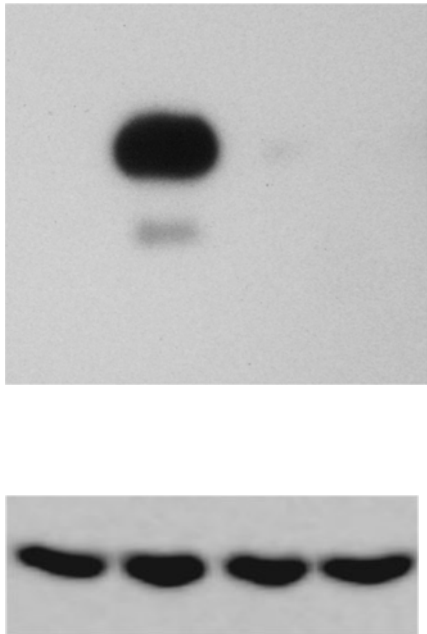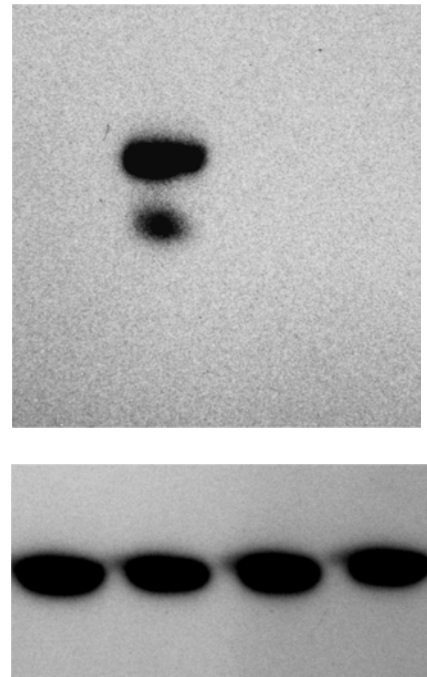

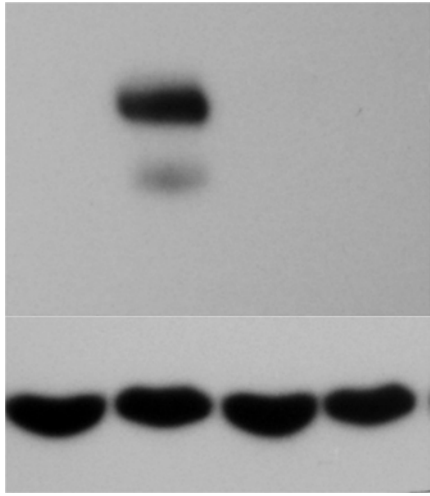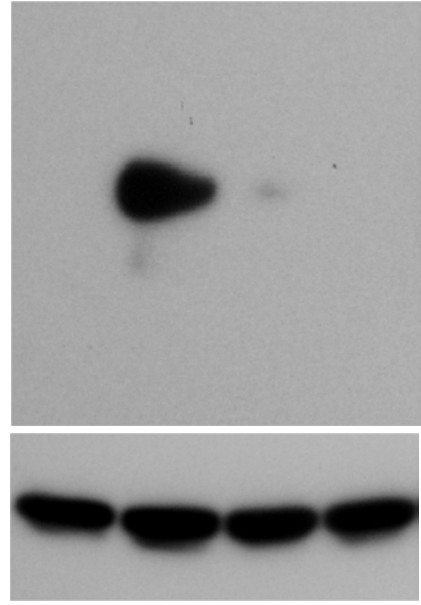

**Fig. 4C**  
**pP75NTR / actin**

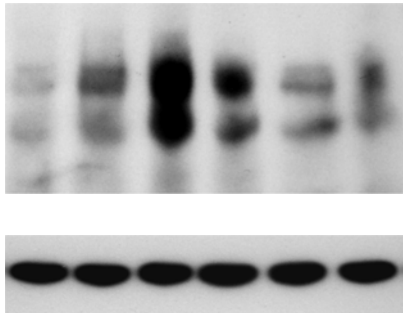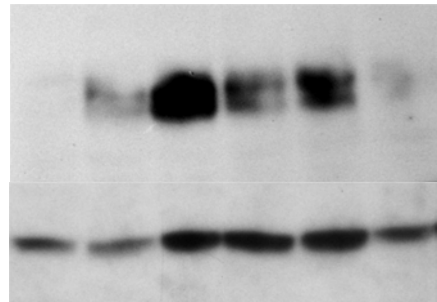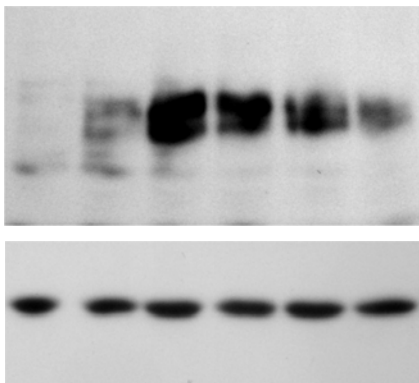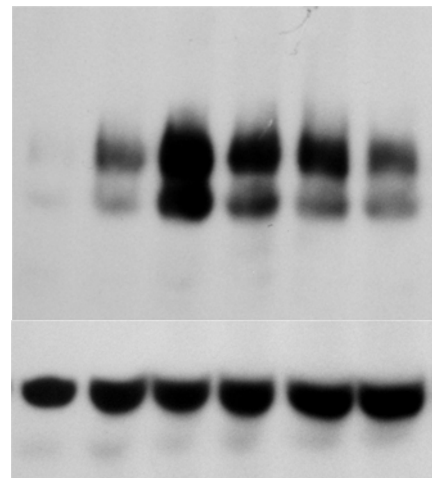

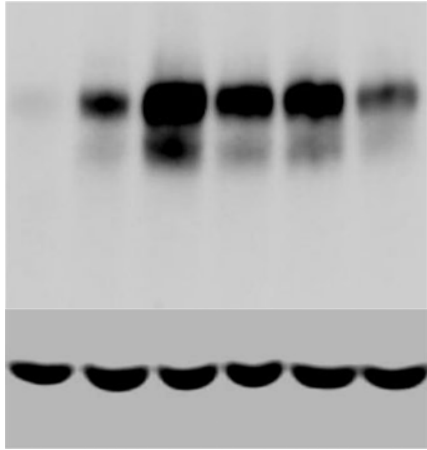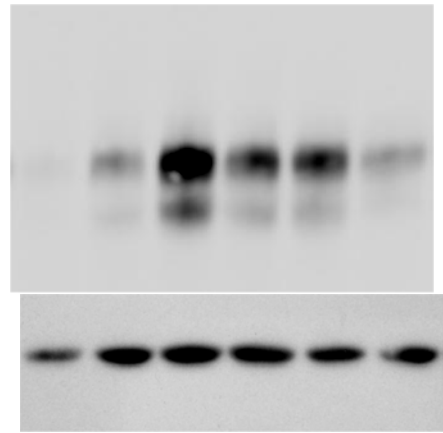

**Fig. 4D**  
**p75NTR / actin**

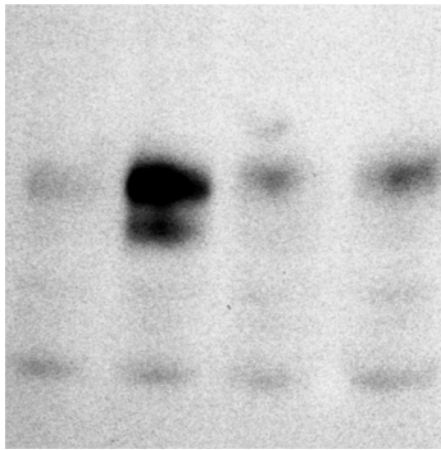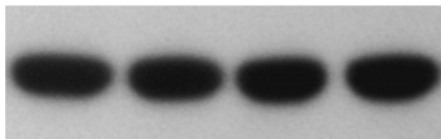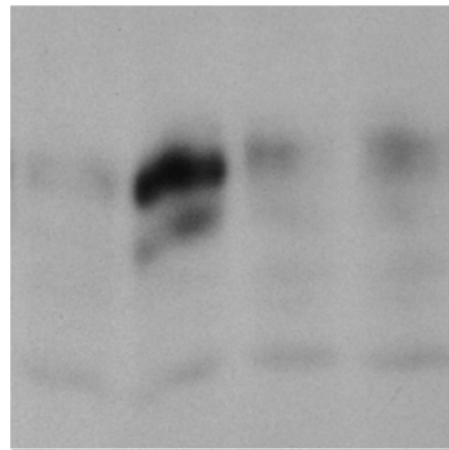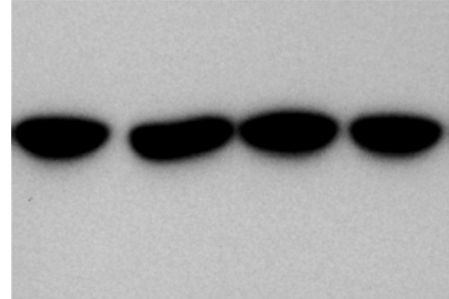

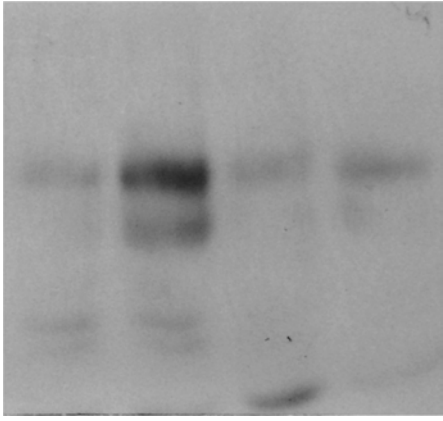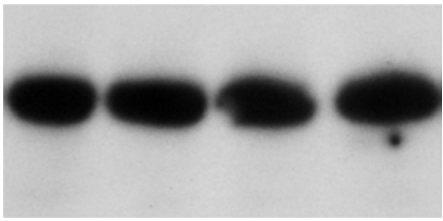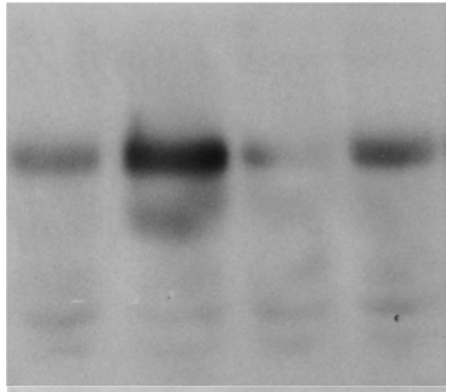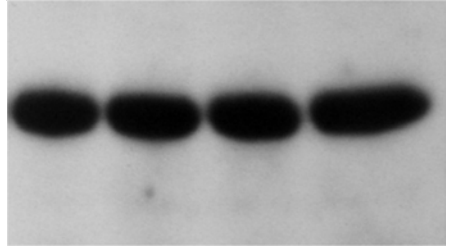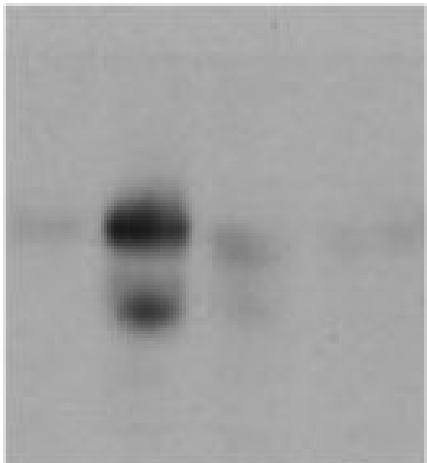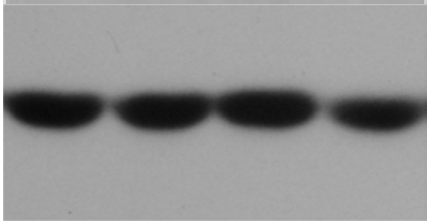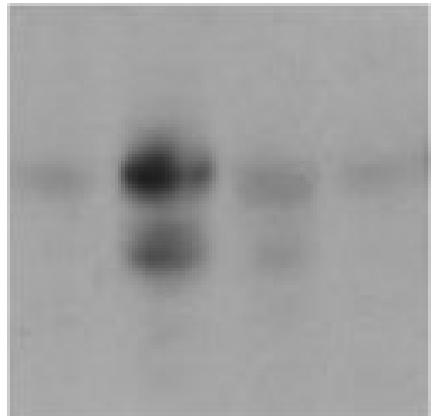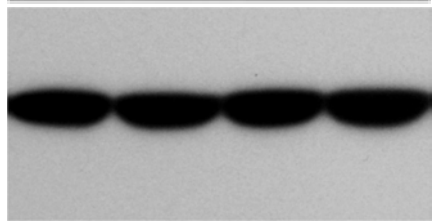

**Fig. 4E**  
**sortilin / actin**

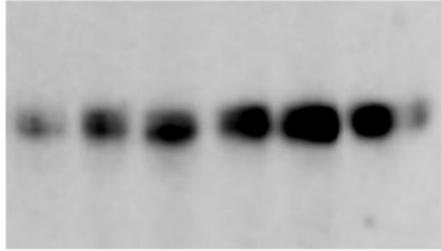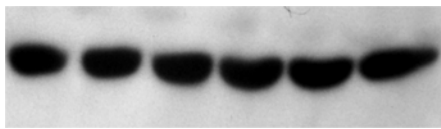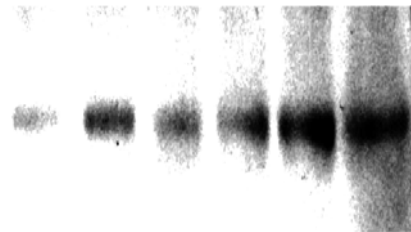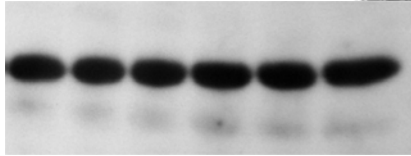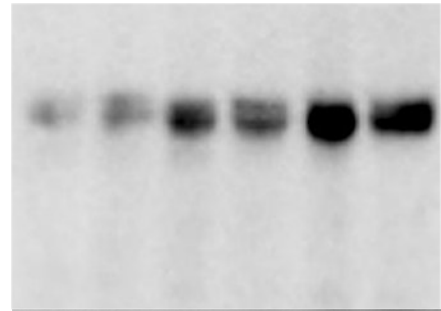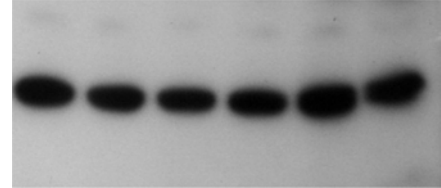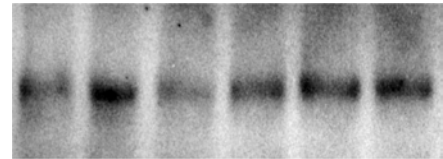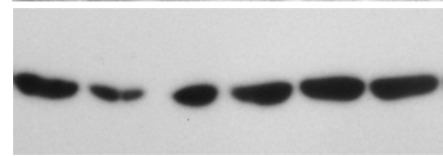

**Fig. 4F**

**sortilin / actin**

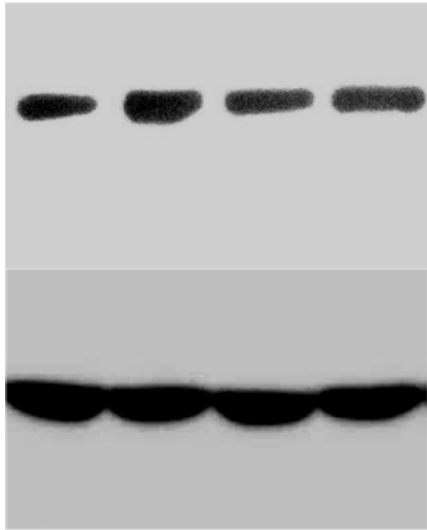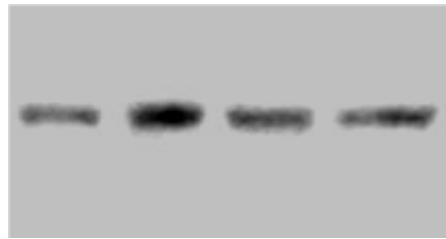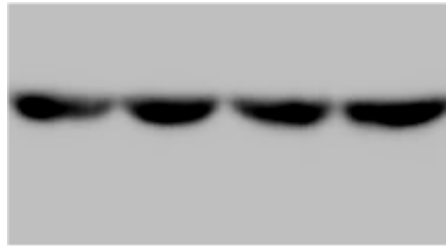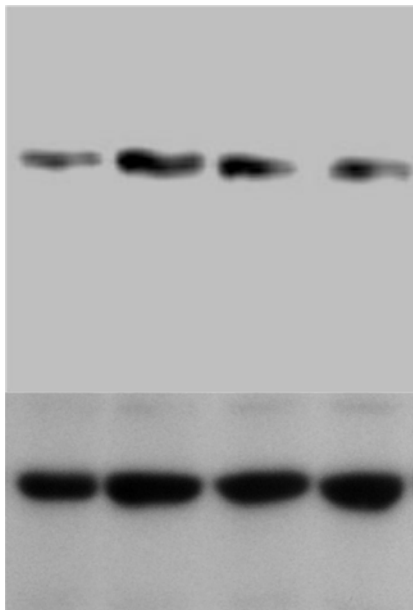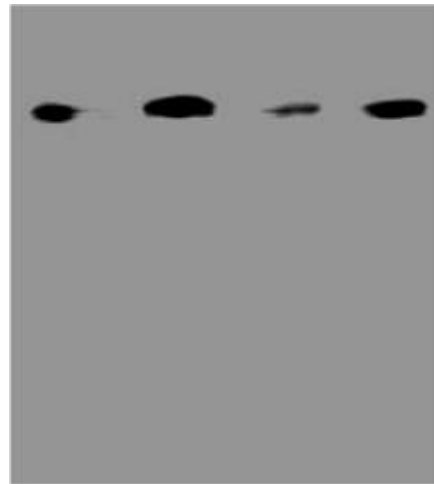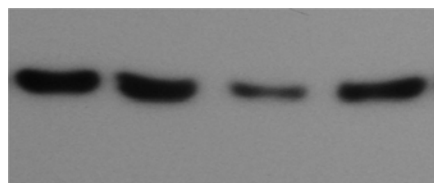



Fig. 4G

sortilin / actin

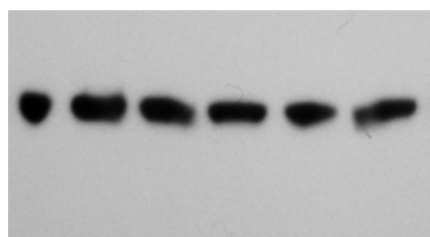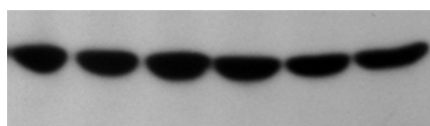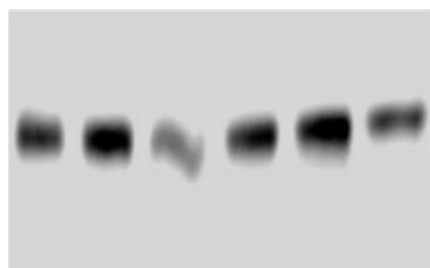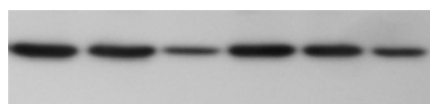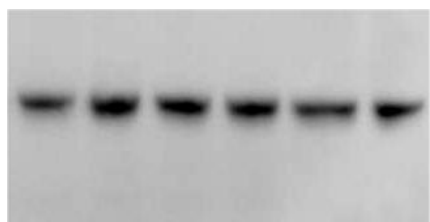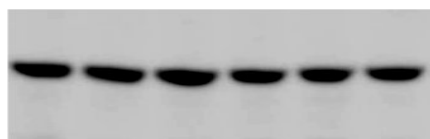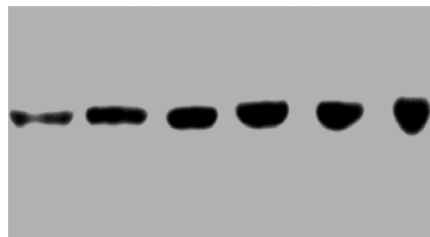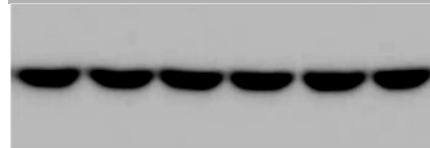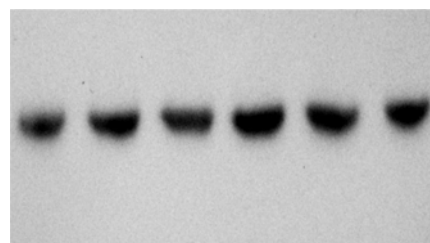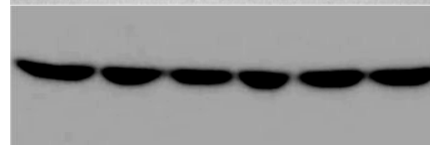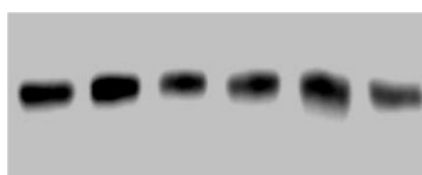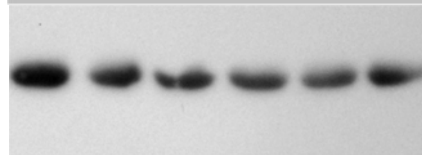

**Fig. 4H**  
**sortilin / actin**

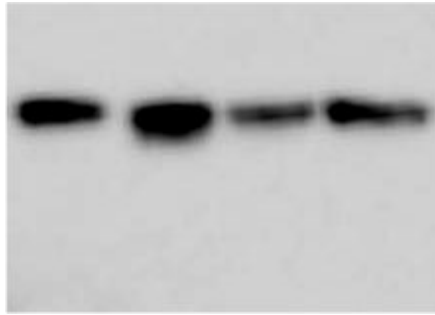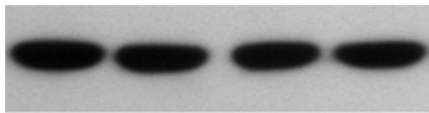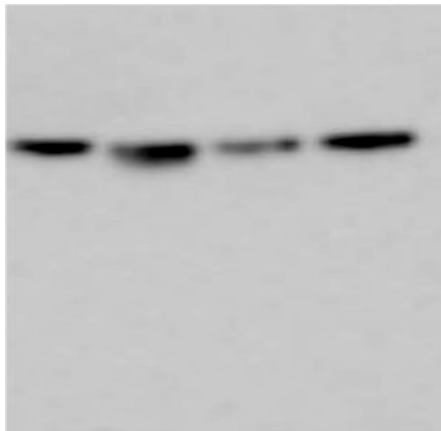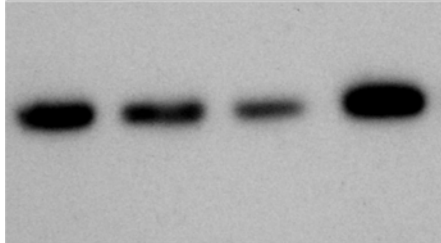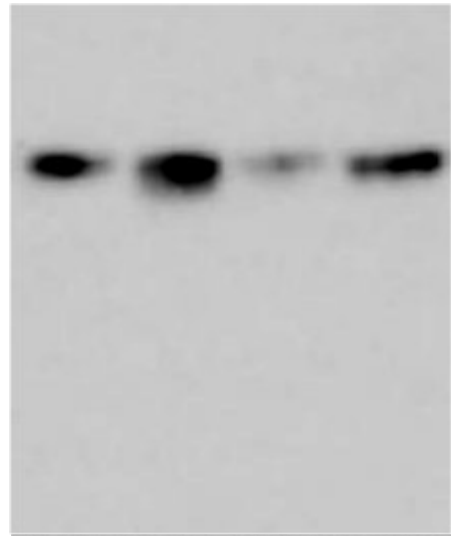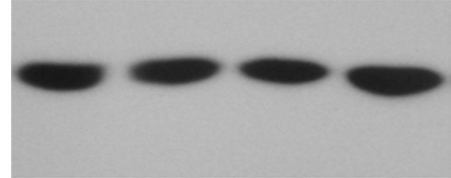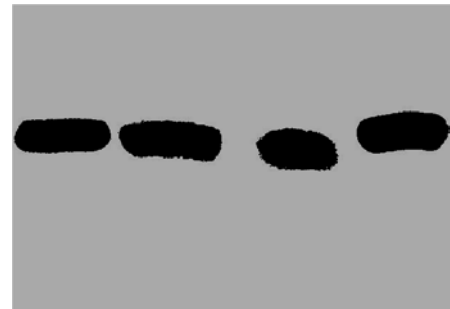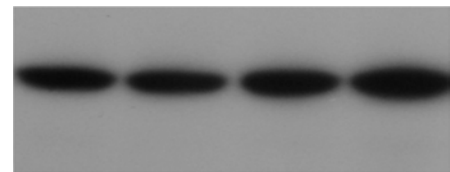

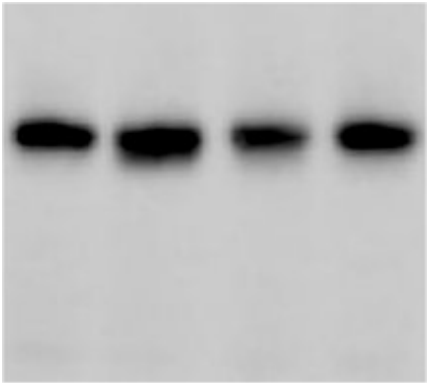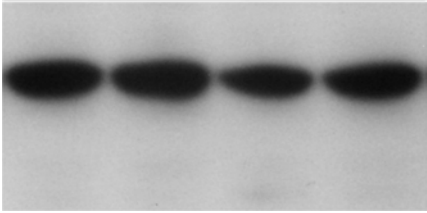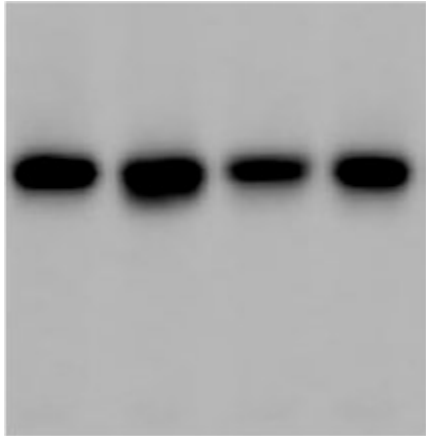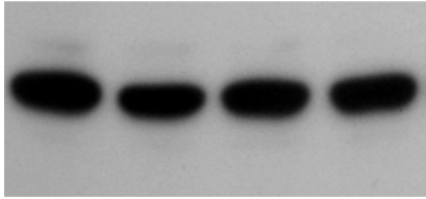

**Fig. 5A**

**HDAC1-p75NTR / actin**

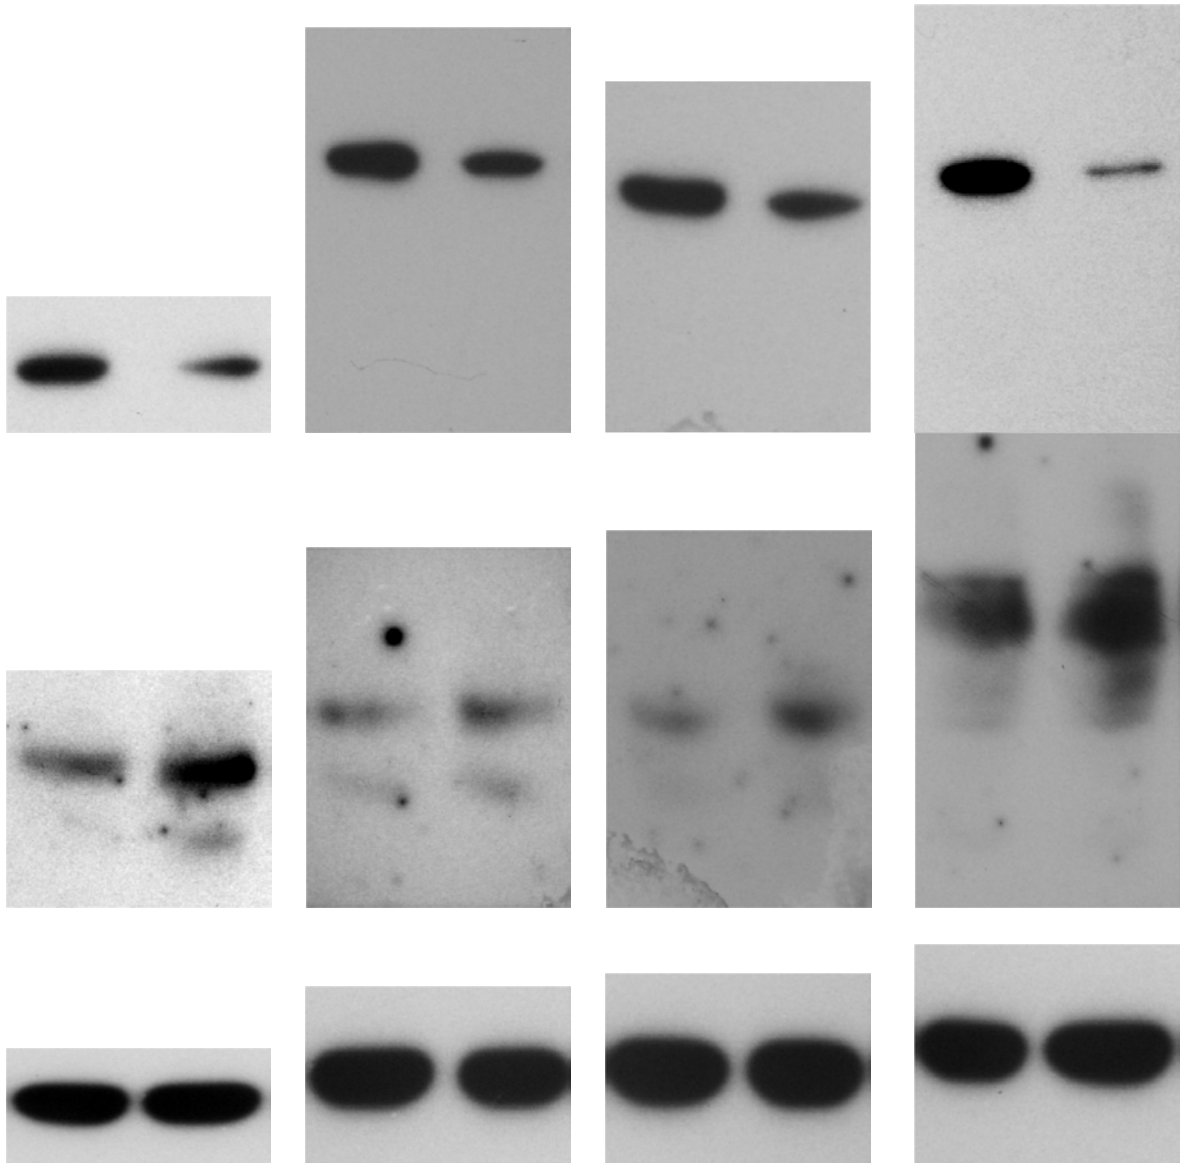

**Fig. 5B**

**EZH2-CASZ1 / actin**

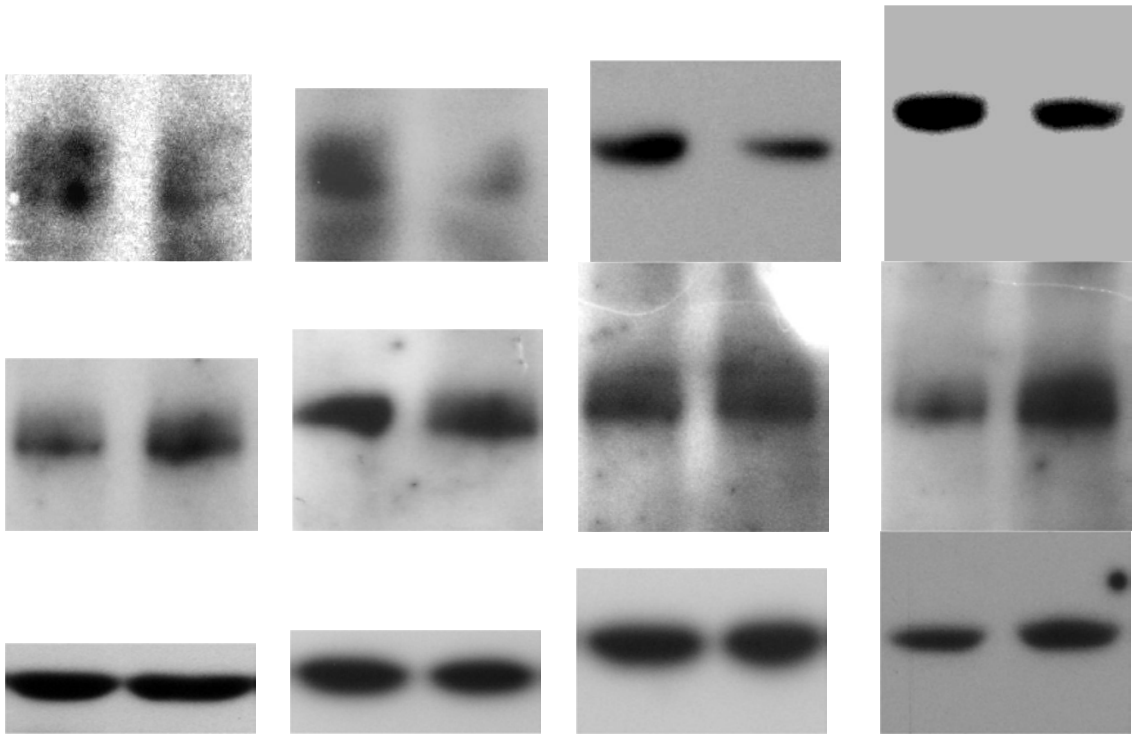

**Fig. 5C**

**EZH2 - CASZ1 / actin**

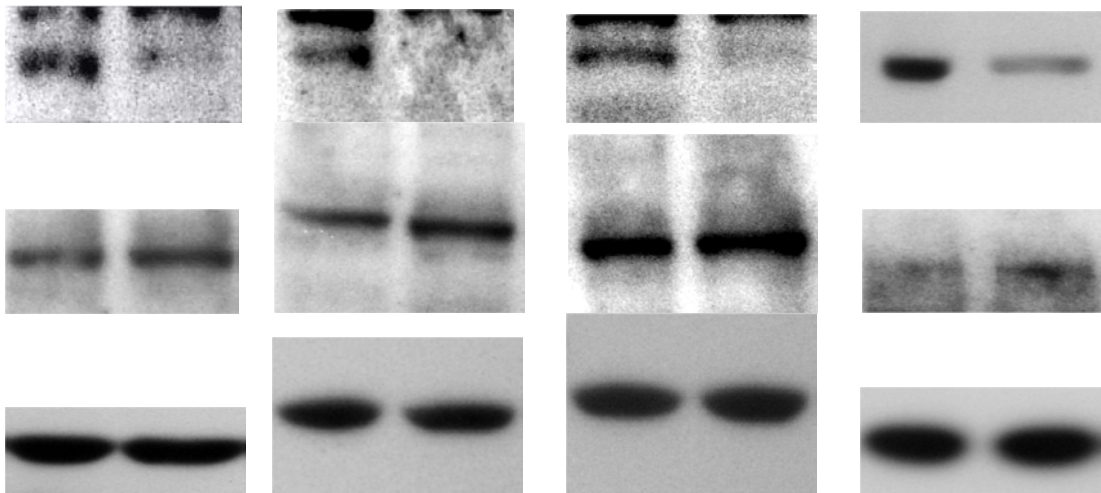

Fig. 5D

p75NTR / actin

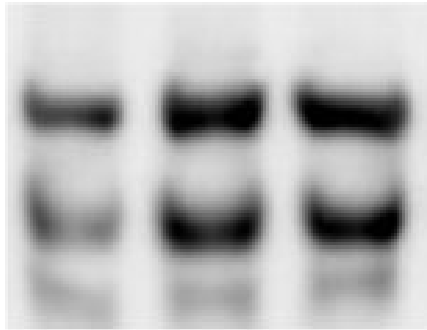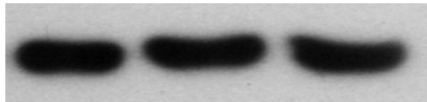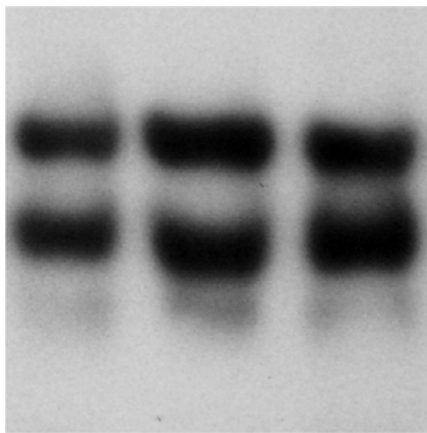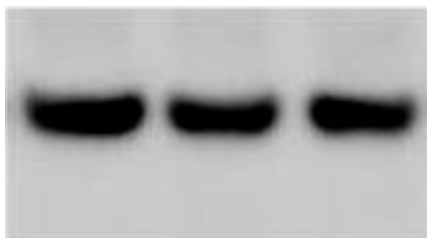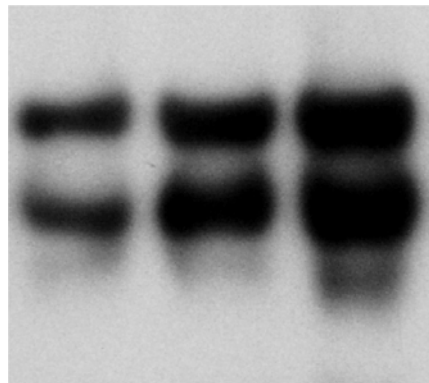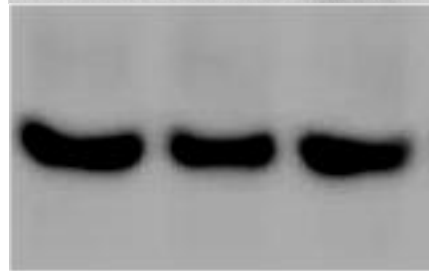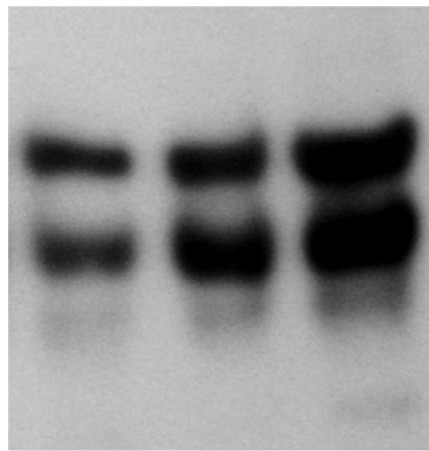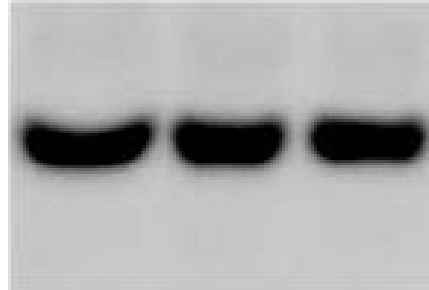

Fig. 5E

CASZ1 – p75NTR / actin

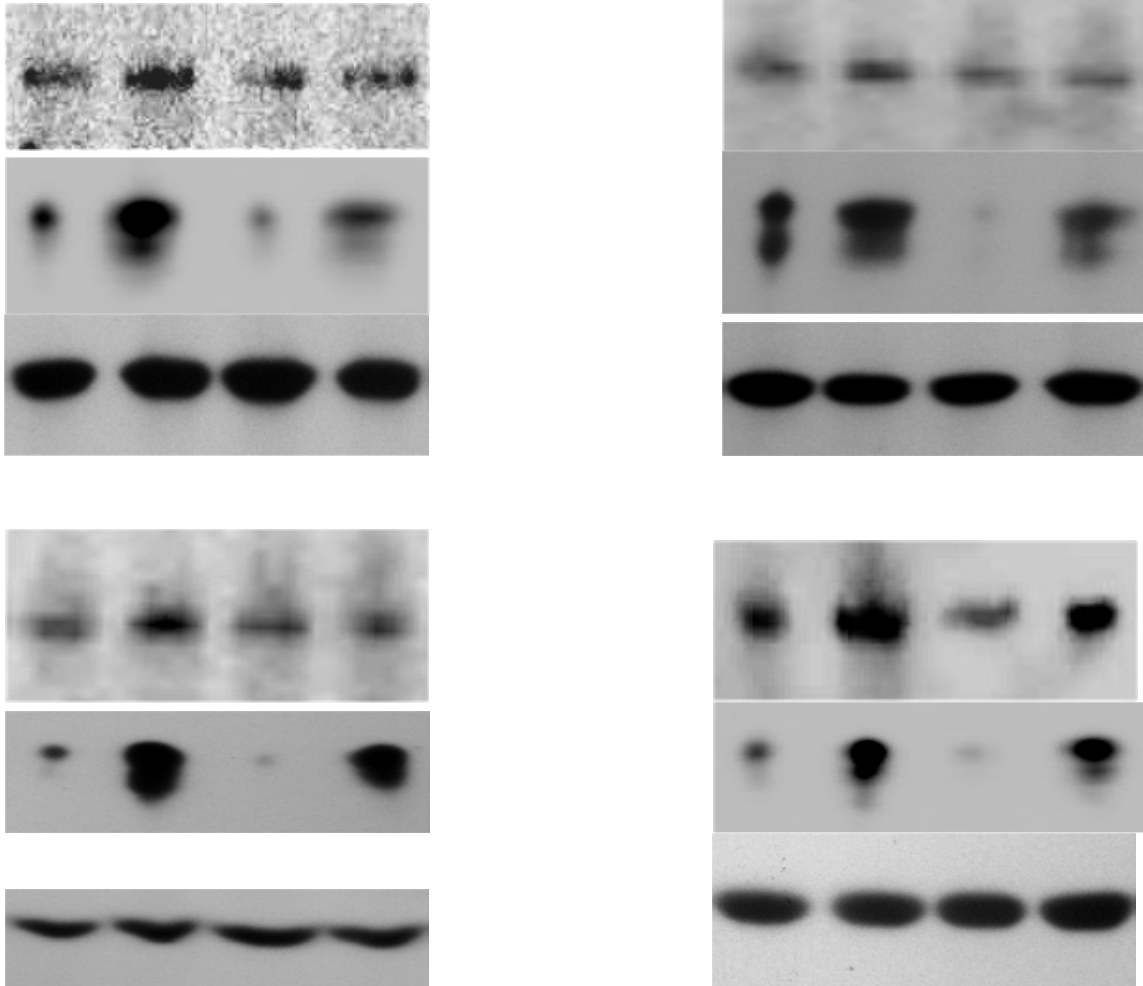

**Fig 6B**

**pJNK / JNK**

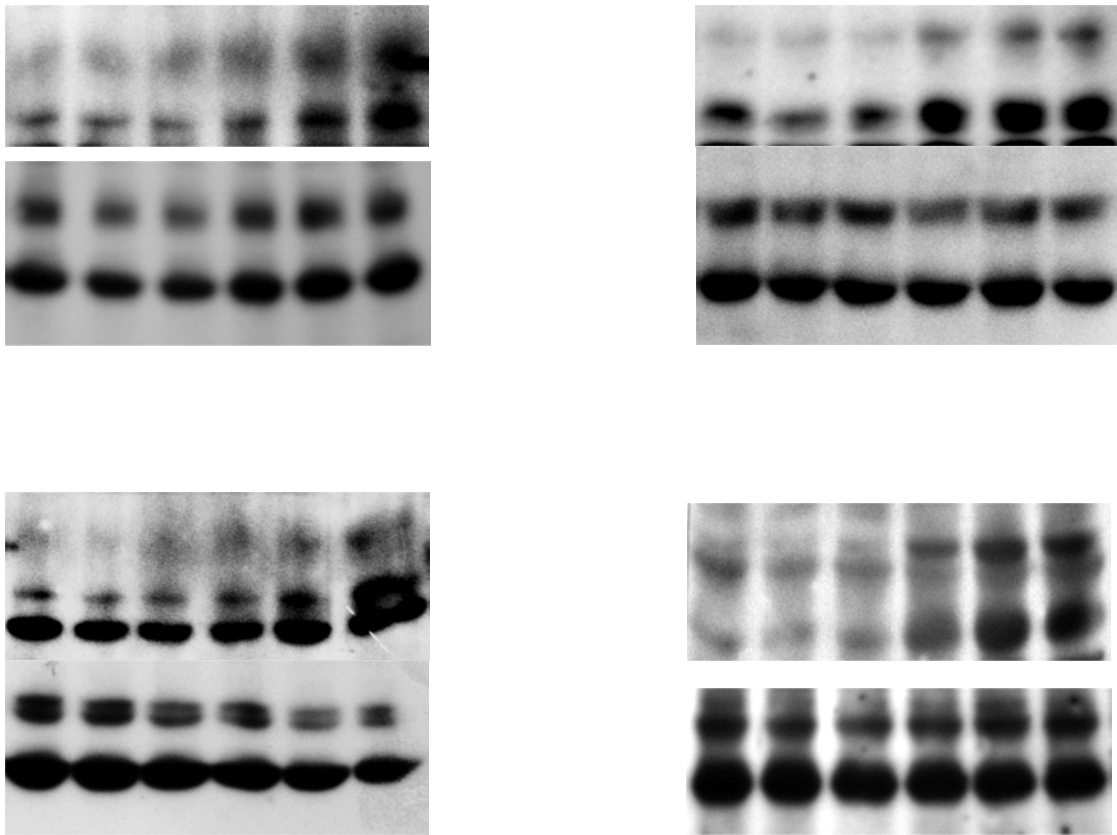

**Fig. 6C**

**p-c-Jun / c-Jun**

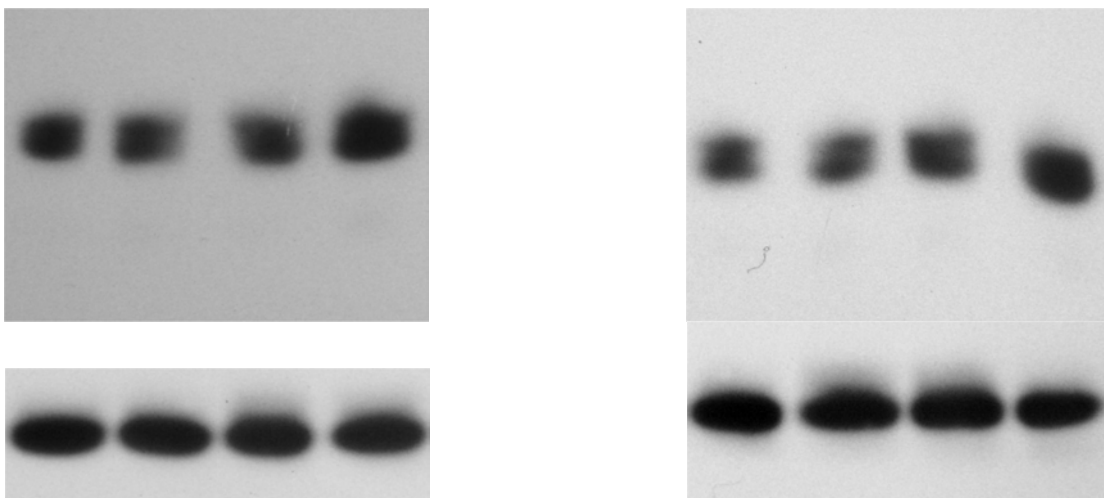



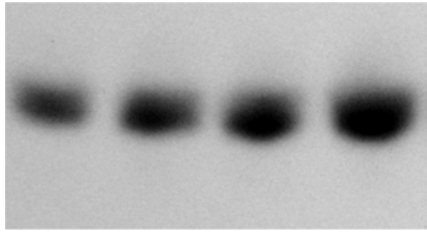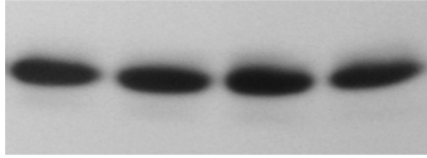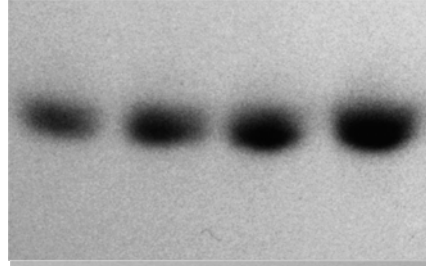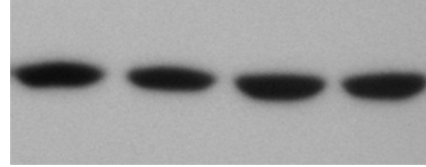

**Fig. 7C - SH-SY5Y-**  
**cleav casp 9 /procasp 9**

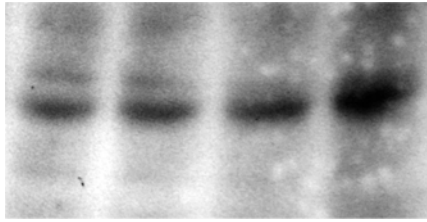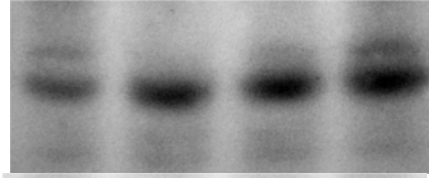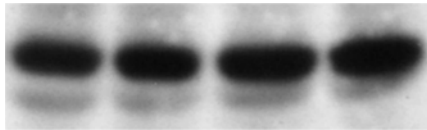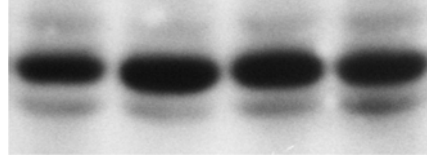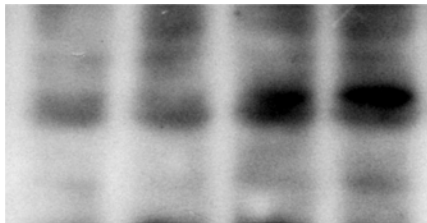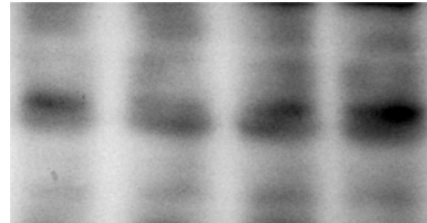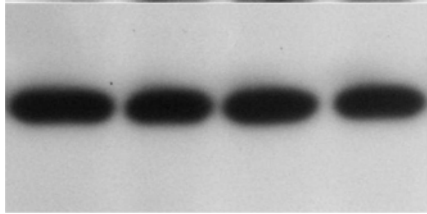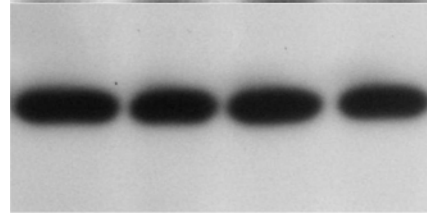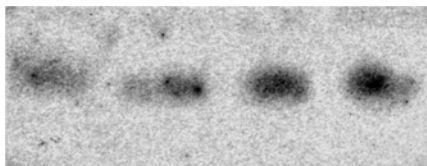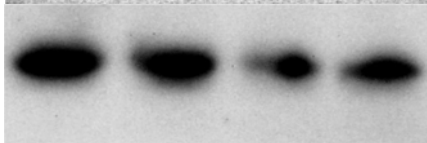

cleav casp 3 / procasp 3

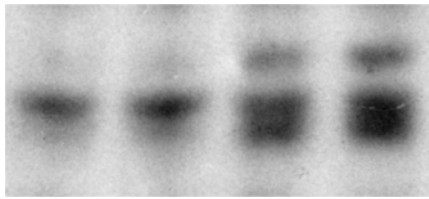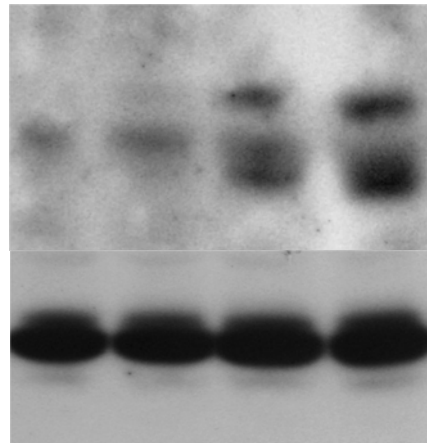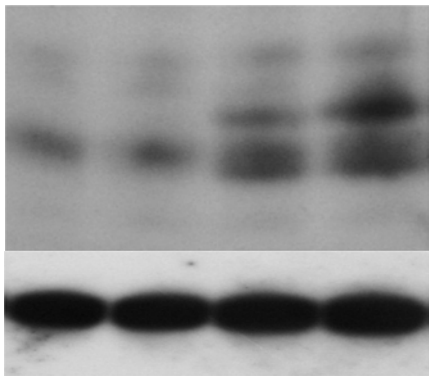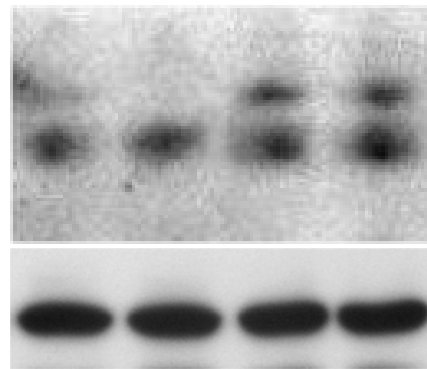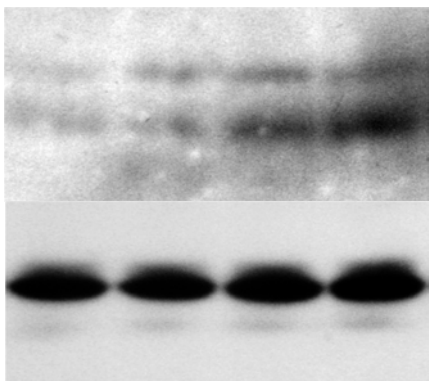

cleav PARP / PARP

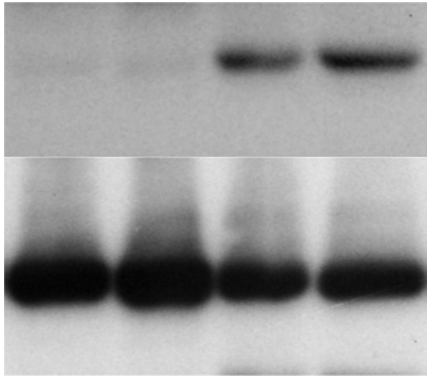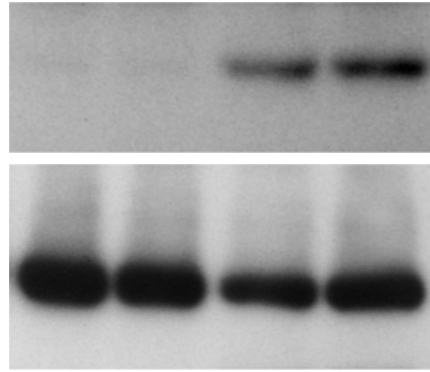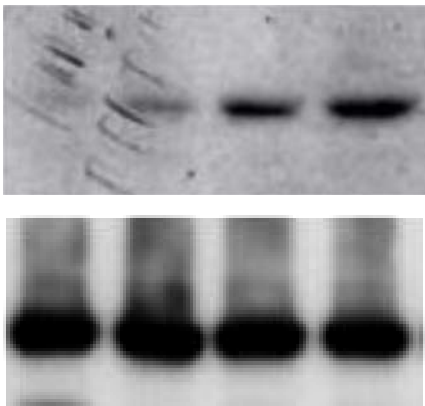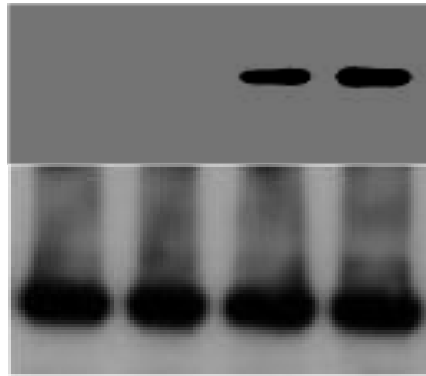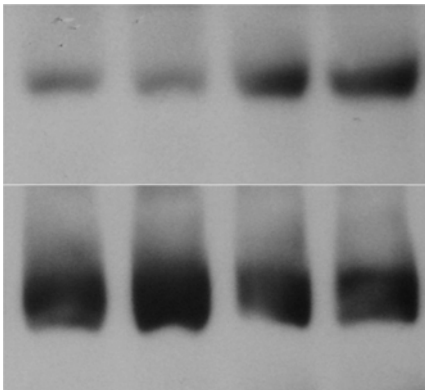

Fig. 7C - LAN 1-

cleav casp 9 / procasp 9

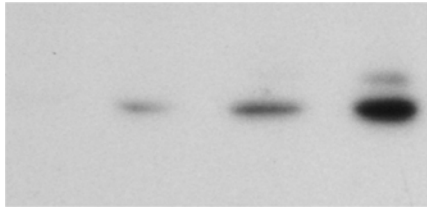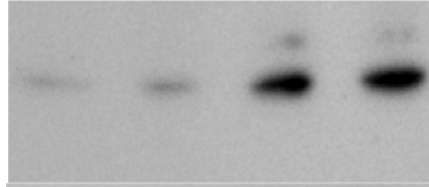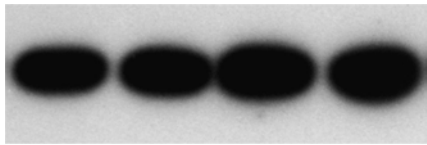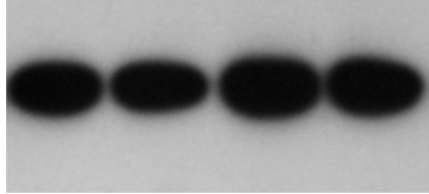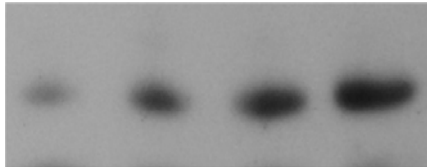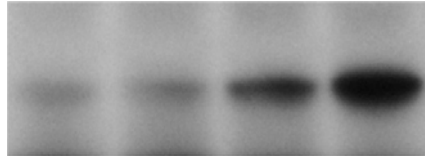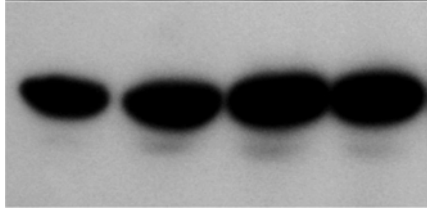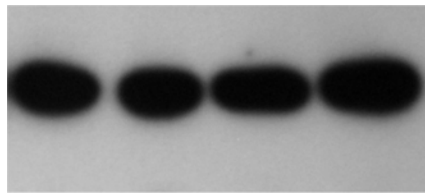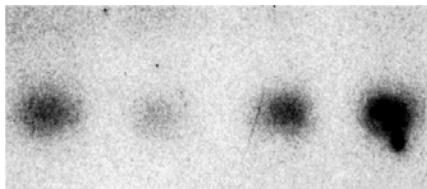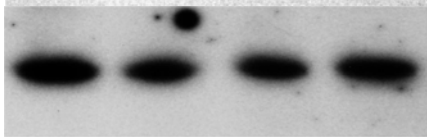

cleav casp 3 / procasp 3

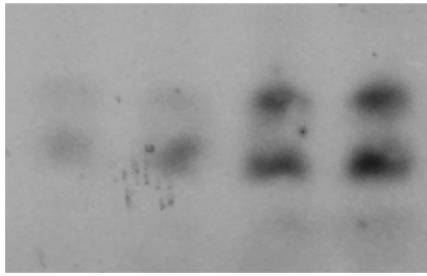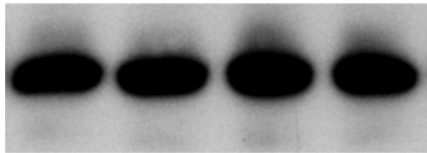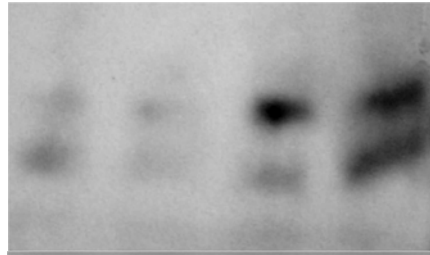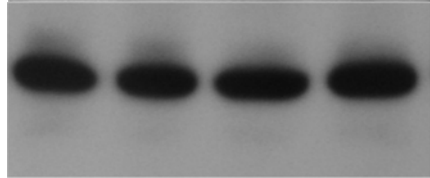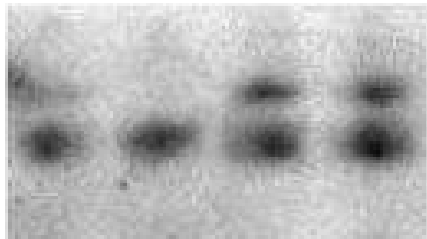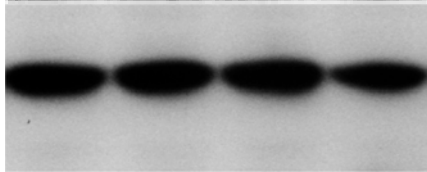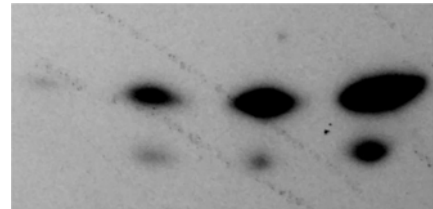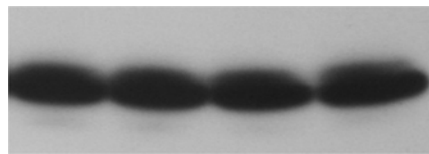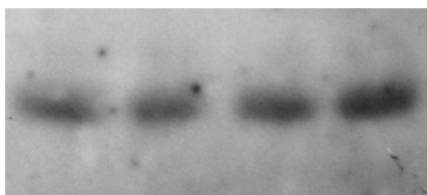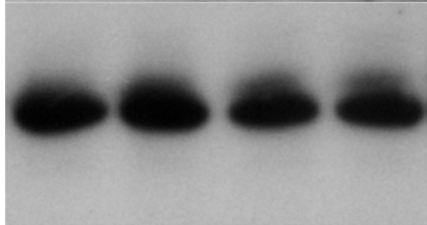

cleav PARP / PARP

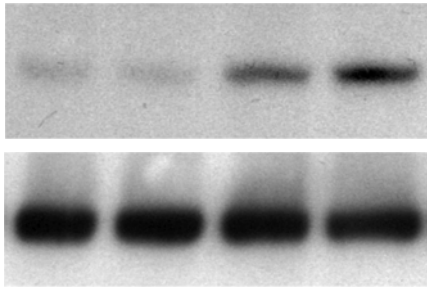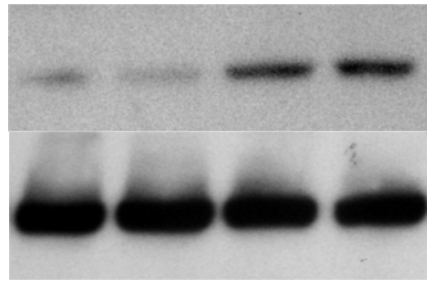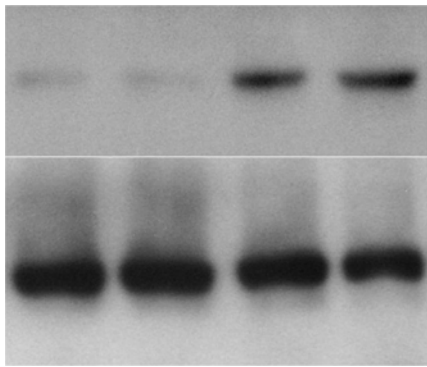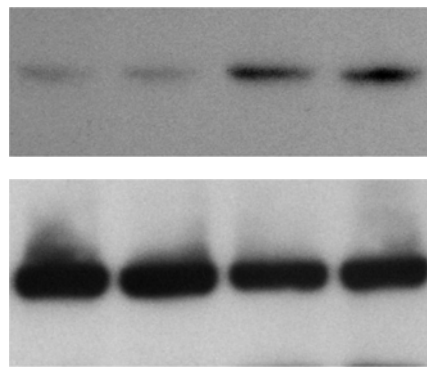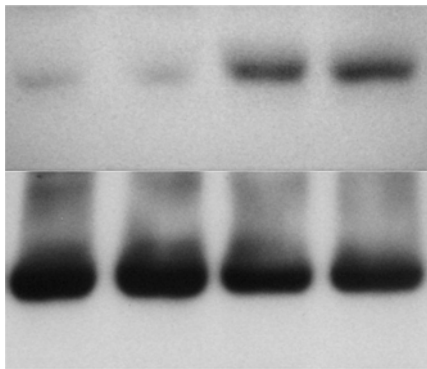

**Fig, 8A**

**p75NTR / actin**

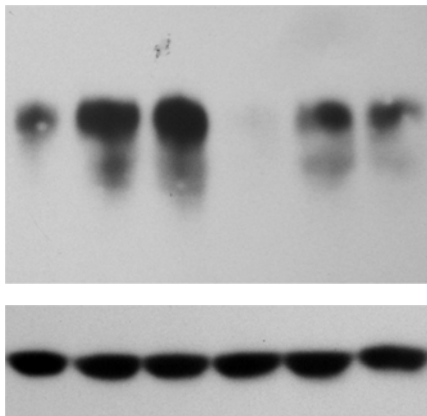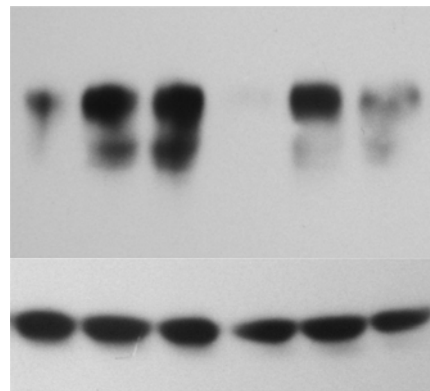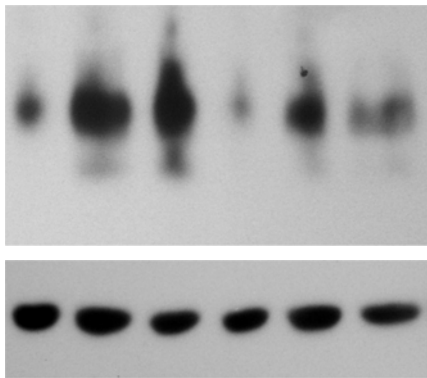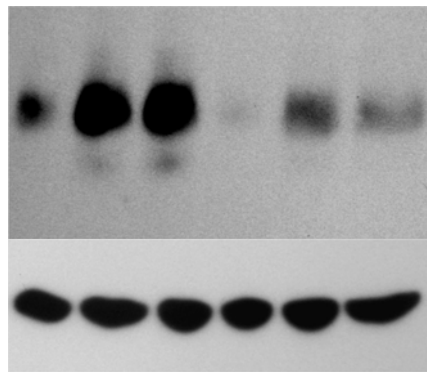

**pJNK / JNK**

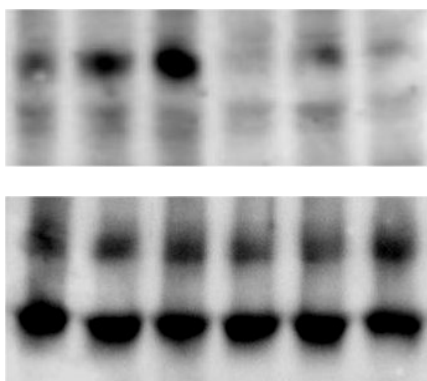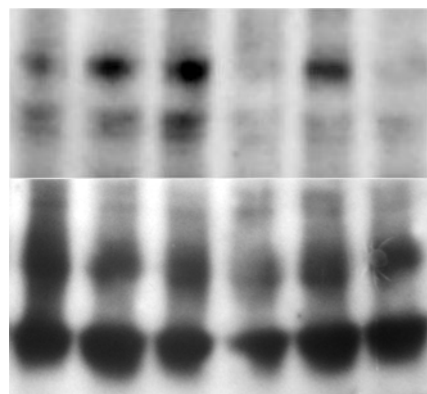



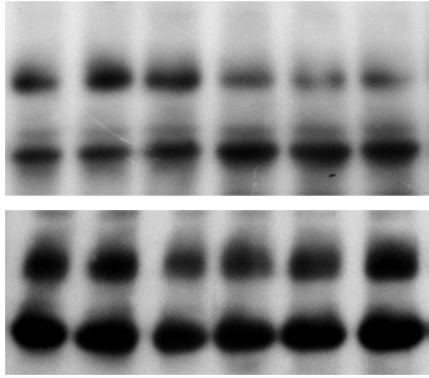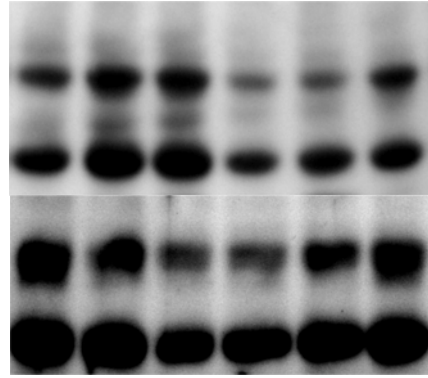

**cleav PARP / PARP**

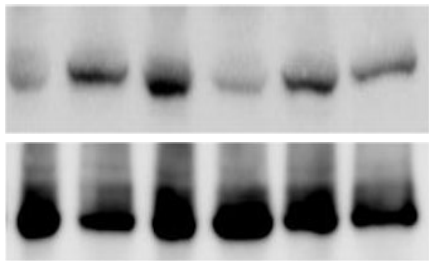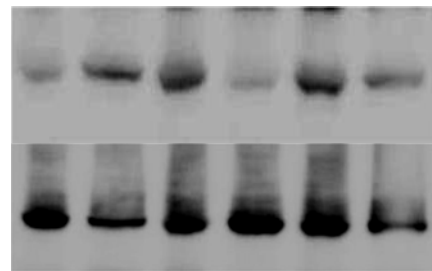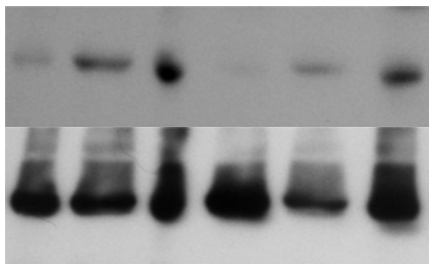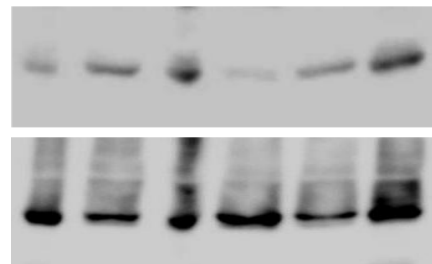

**Fig. 8B**

**cleav PARP / PARP**

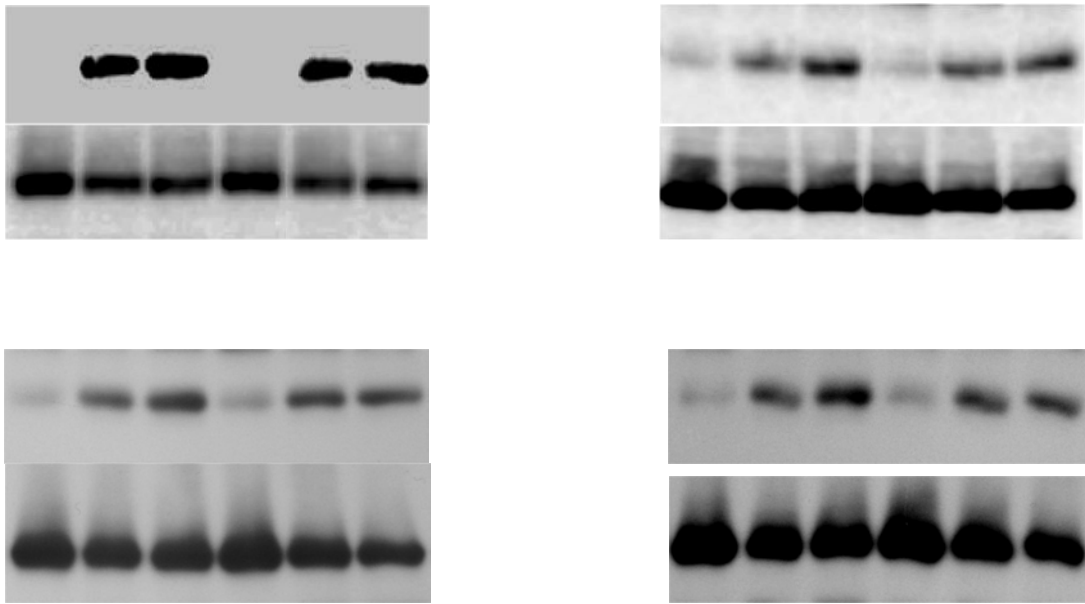

**Fig. 9A**

**p75NTR / actin**

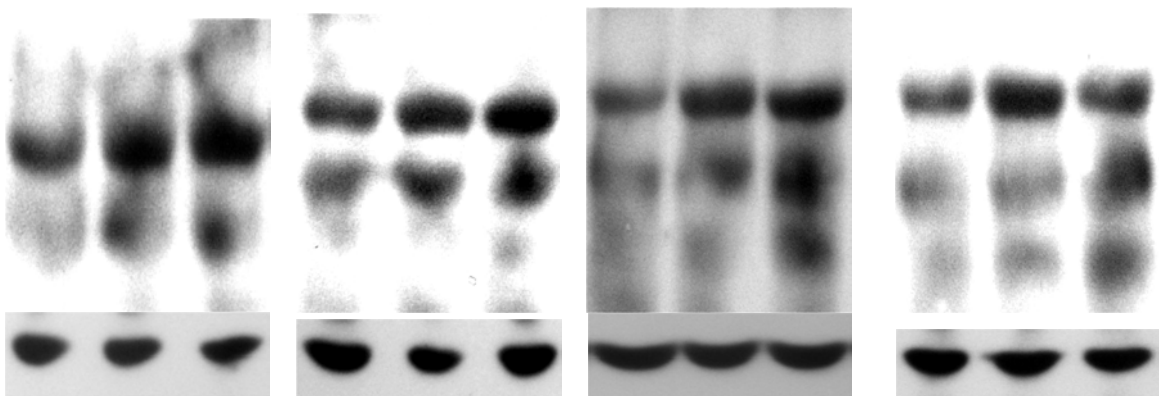

sortilin / actin

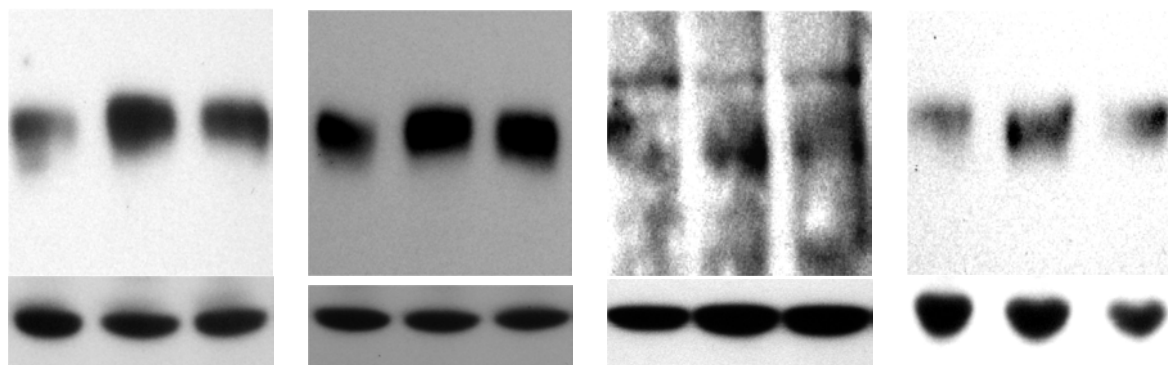

Supplement: 10495_2020_1626_MOESM1_ESM.pdf [file 10495_2020_1626_MOESM1_ESM.pdf]
